# Supplementary material for: HIF factors cooperate with PML-RARα to promote acute promyelocytic leukemia progression and relapse
Source: PubMed Central journal article supplement (PMC4023886; doi:10.1002/emmm.201303065), 2014-04-07
Supplement: emmm0006-0640-sd6.pdf [file emmm0006-0640-sd6.pdf]

Supporting Information Figure 1 Panel A  
(Left Panel, upper part)

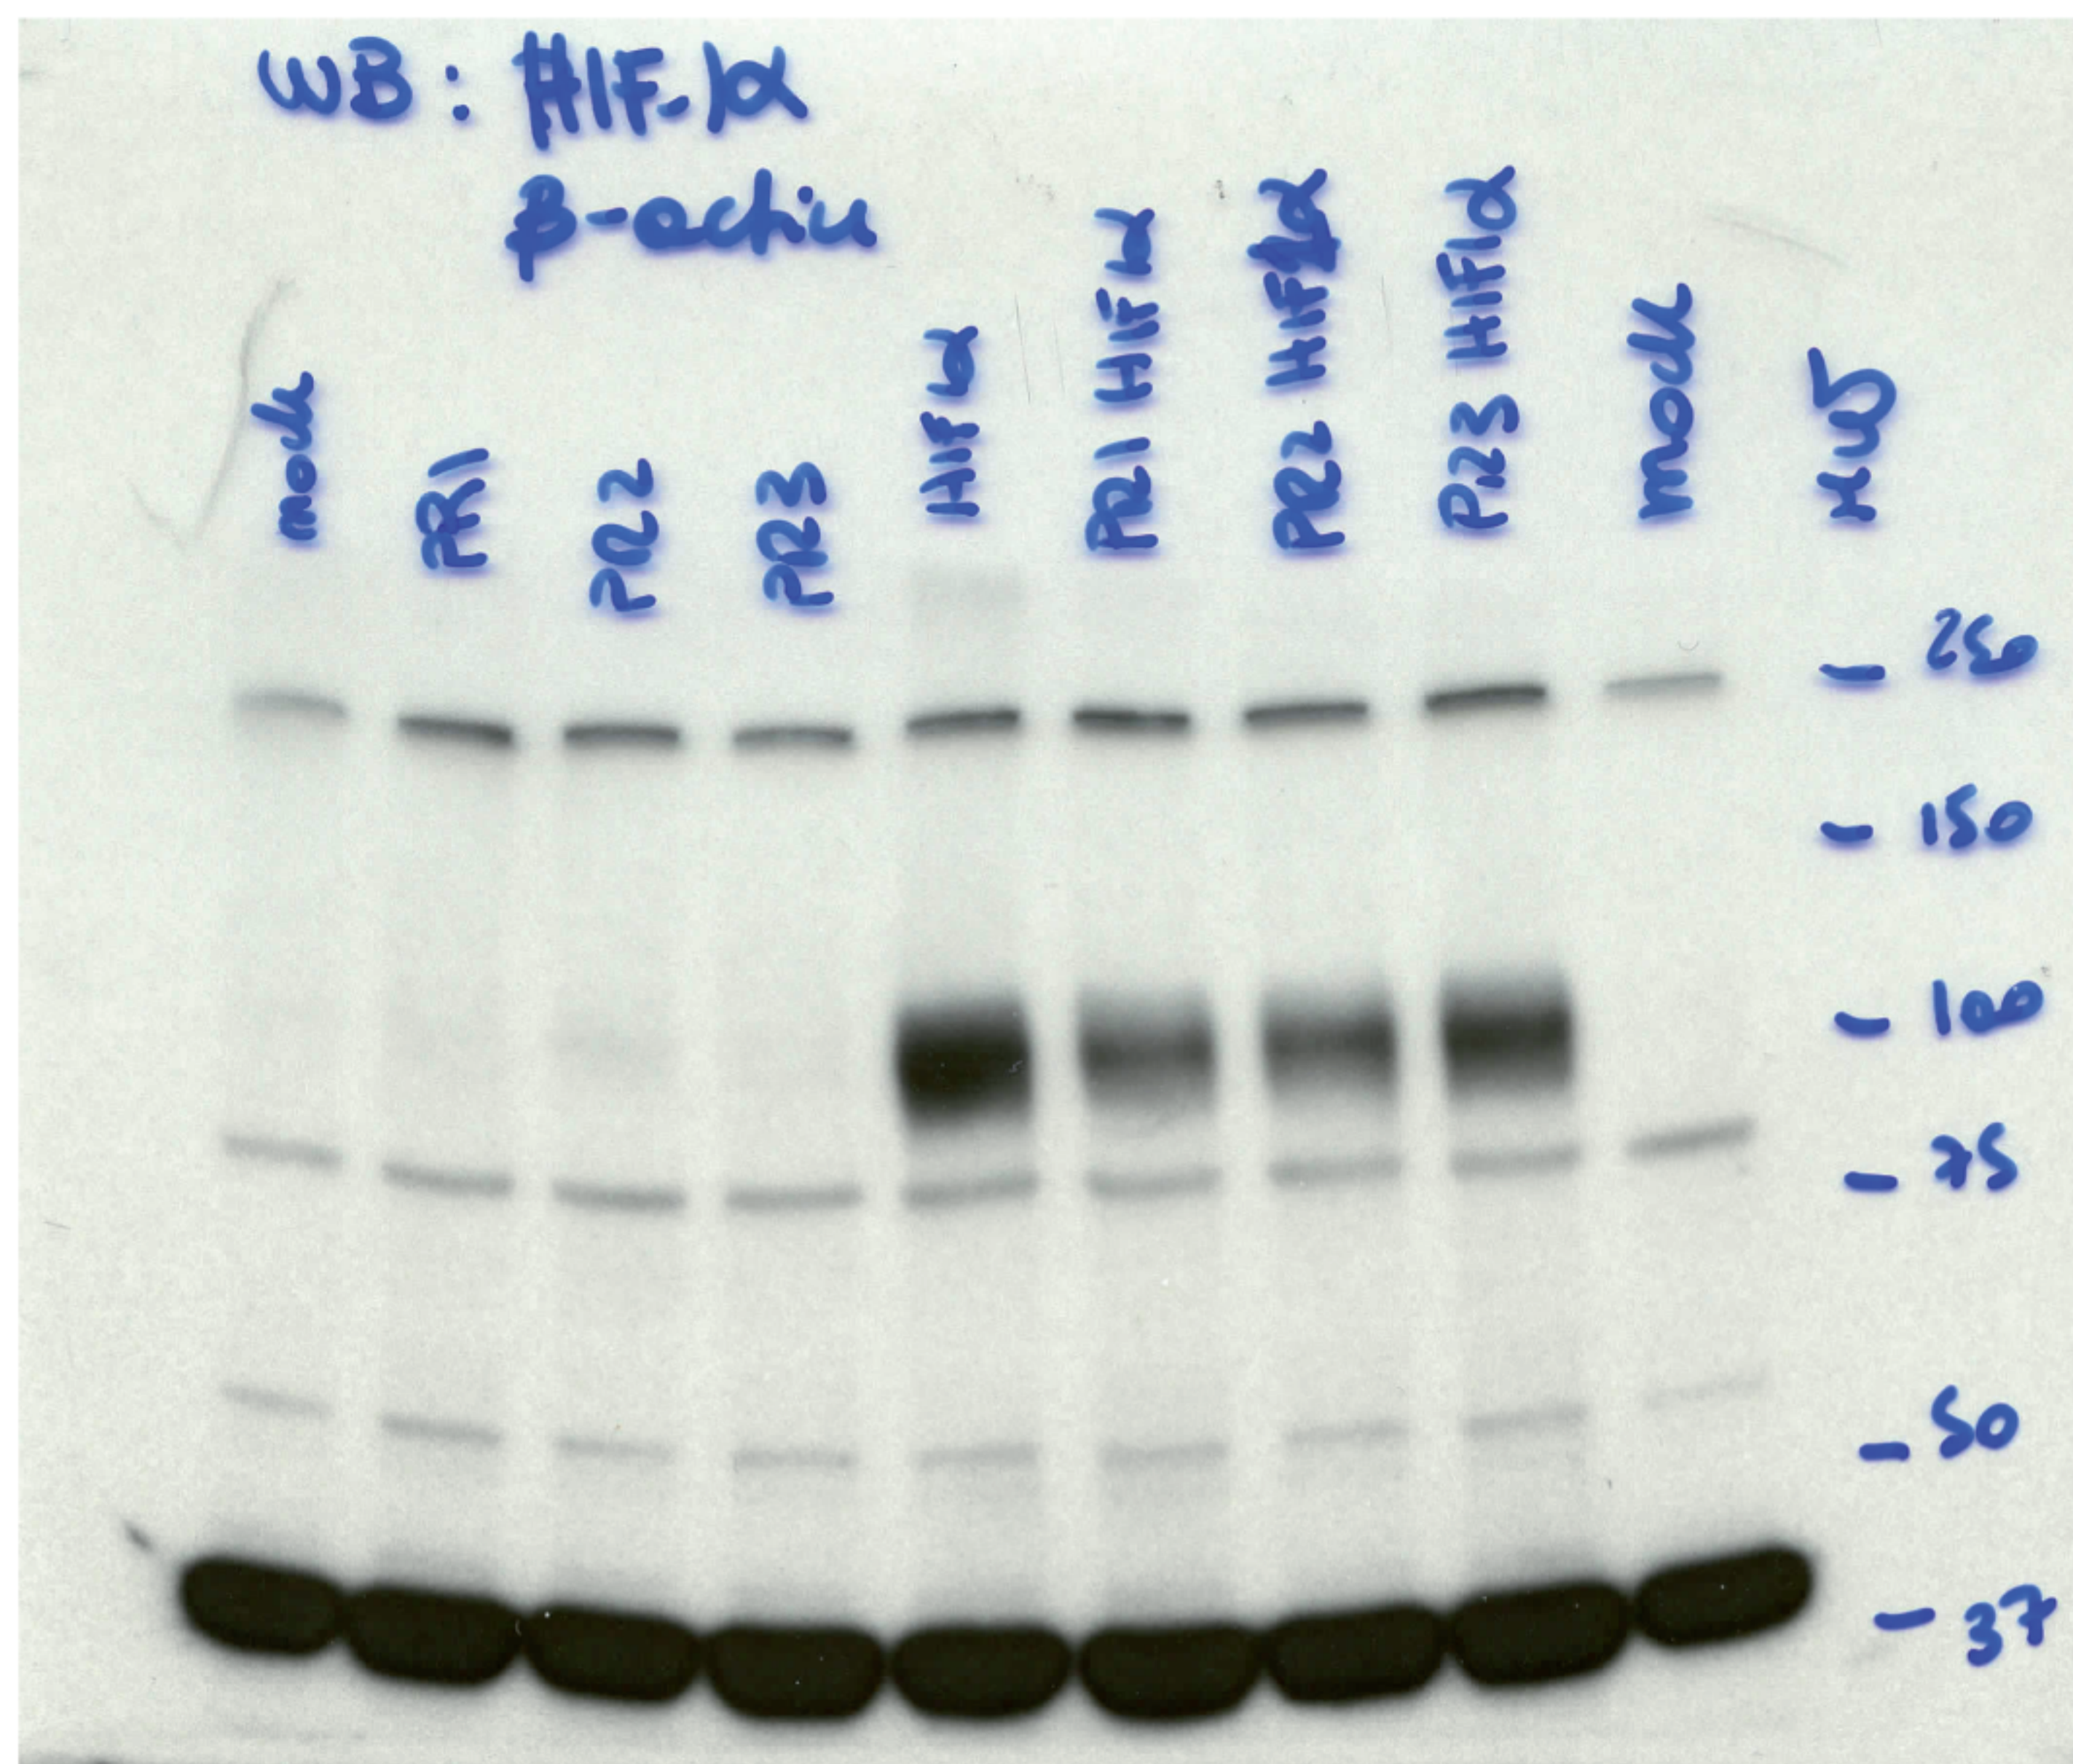

WB: anti-HIF-1α + anti-β-actin

Supporting Information Figure 1 Panel A  
(Left Panel, lower part)

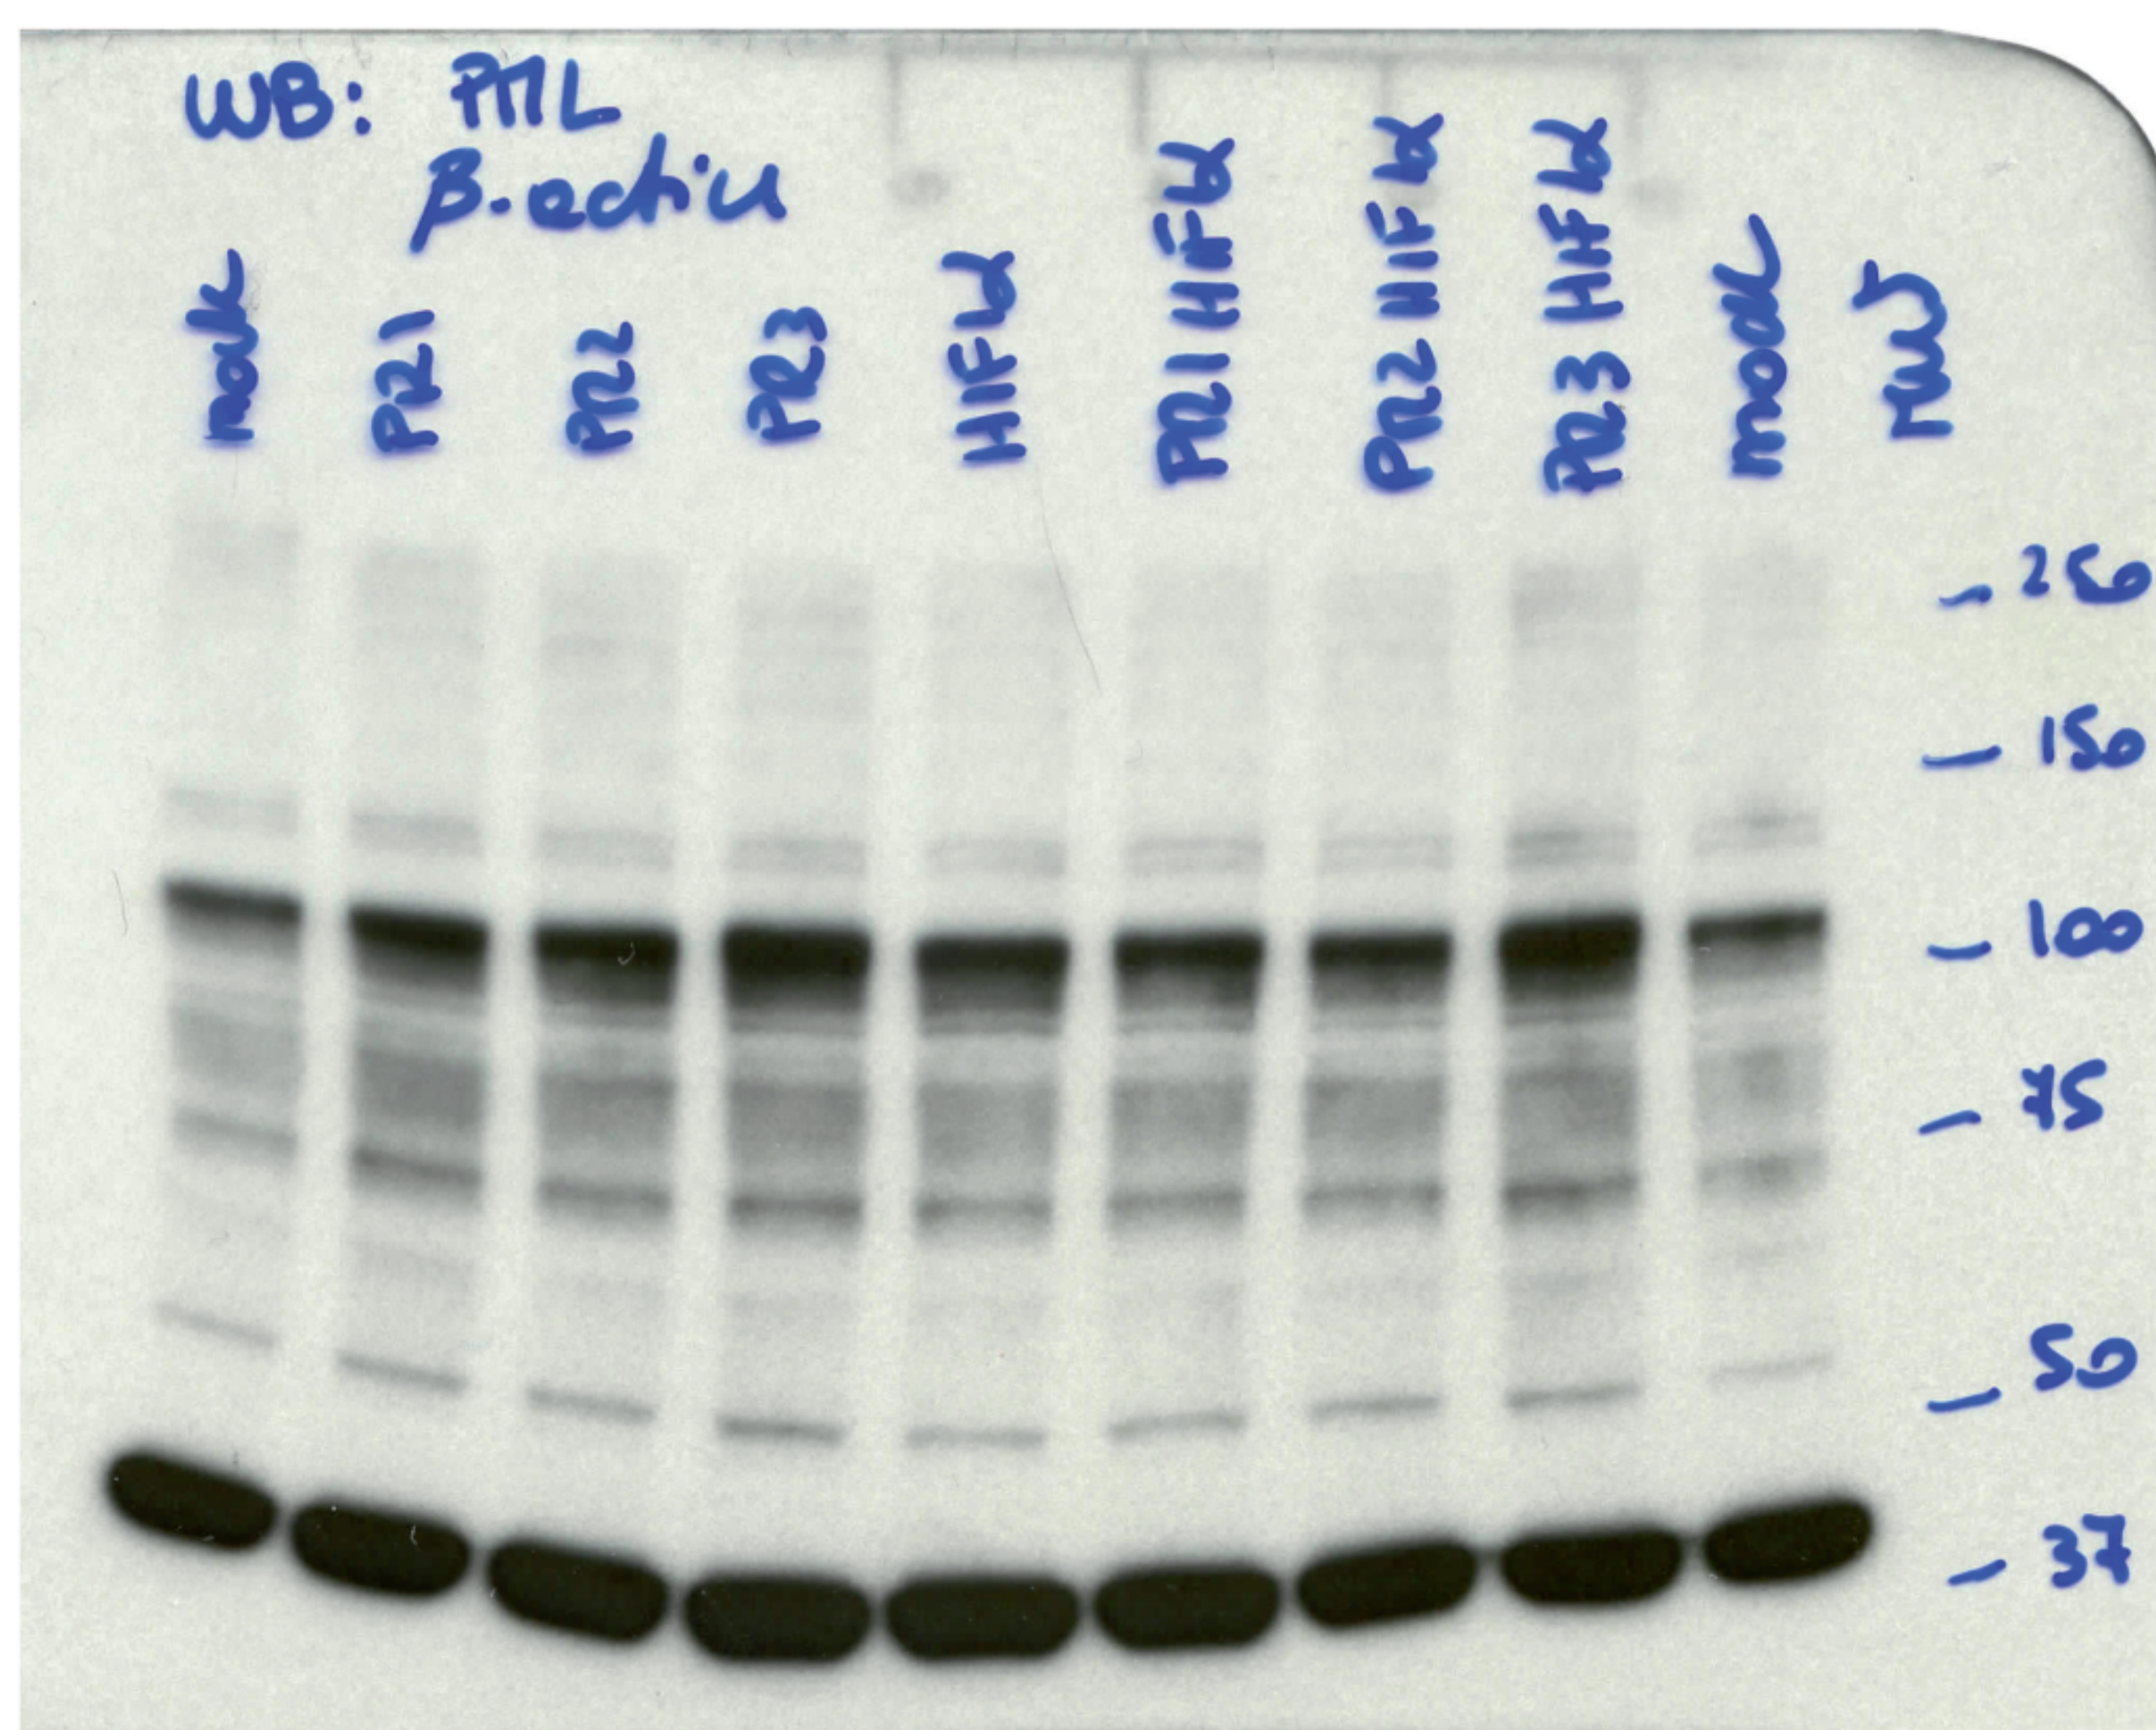

WB: anti-PML + anti-β-actin

Supporting Information Figure 1 Panel A  
(Right Panel, upper part)

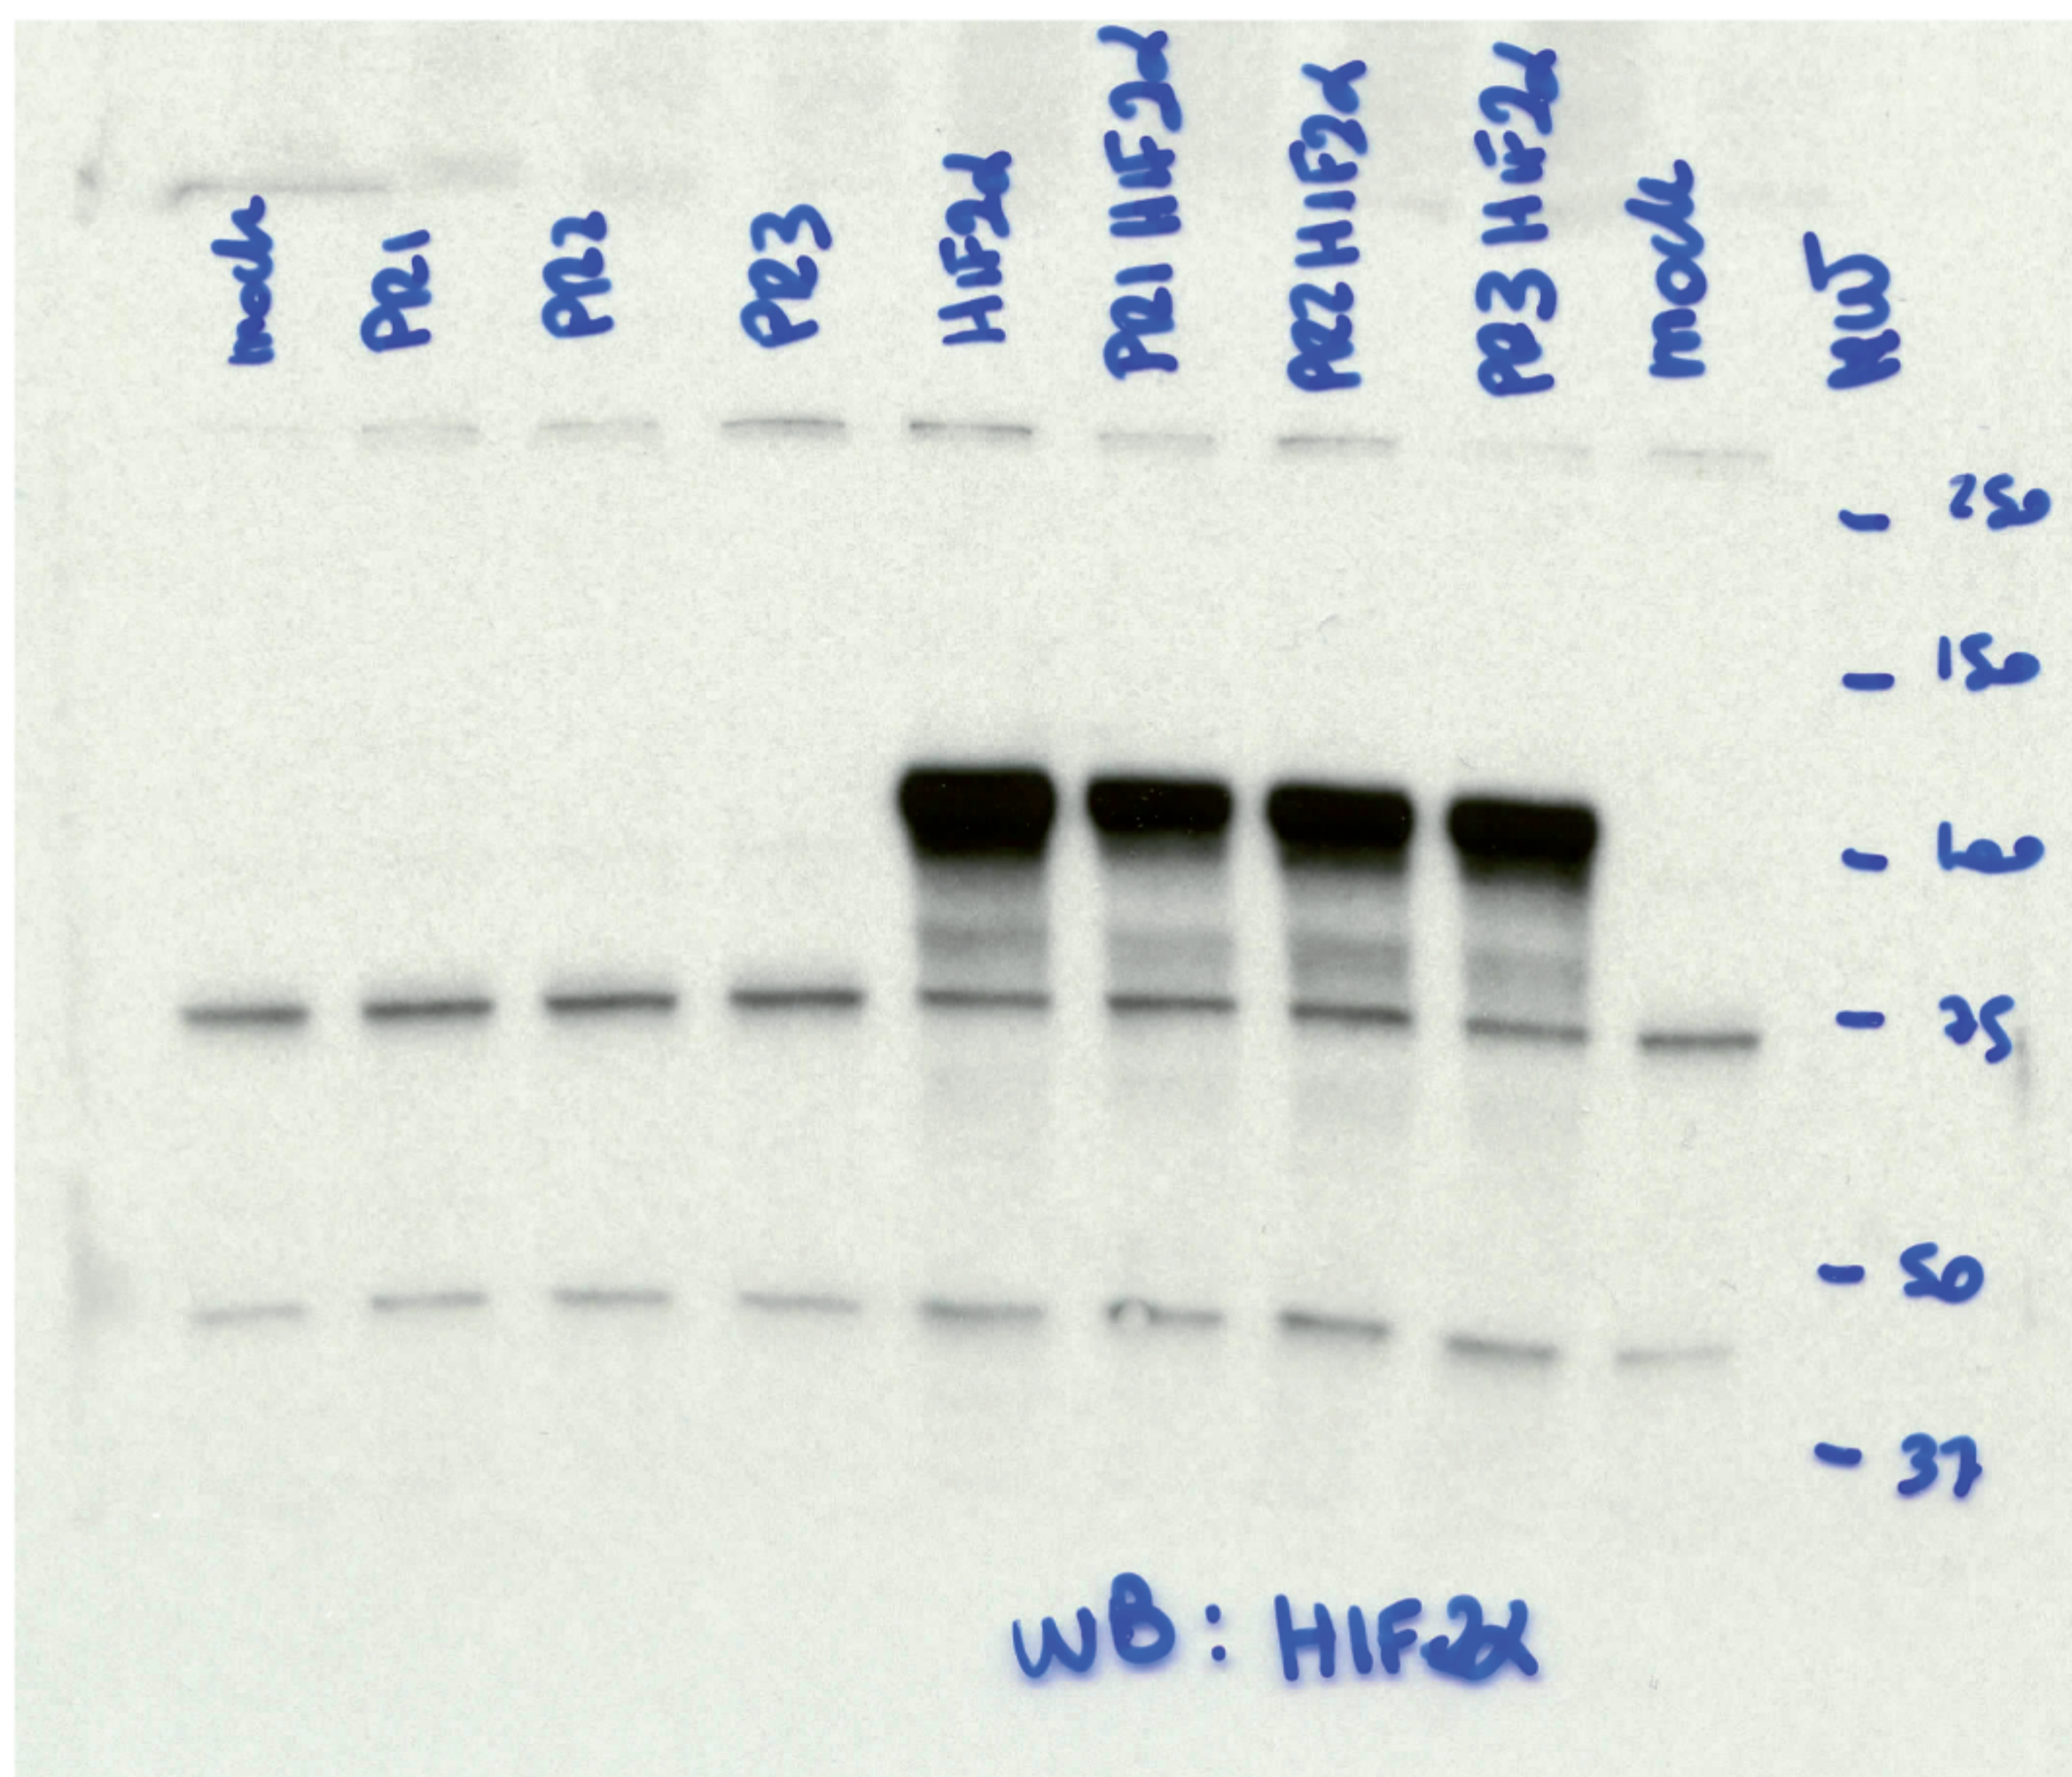

WB: anti-HIF-2α

Supporting Information Figure 1 Panel A  
(Right Panel, lower part)

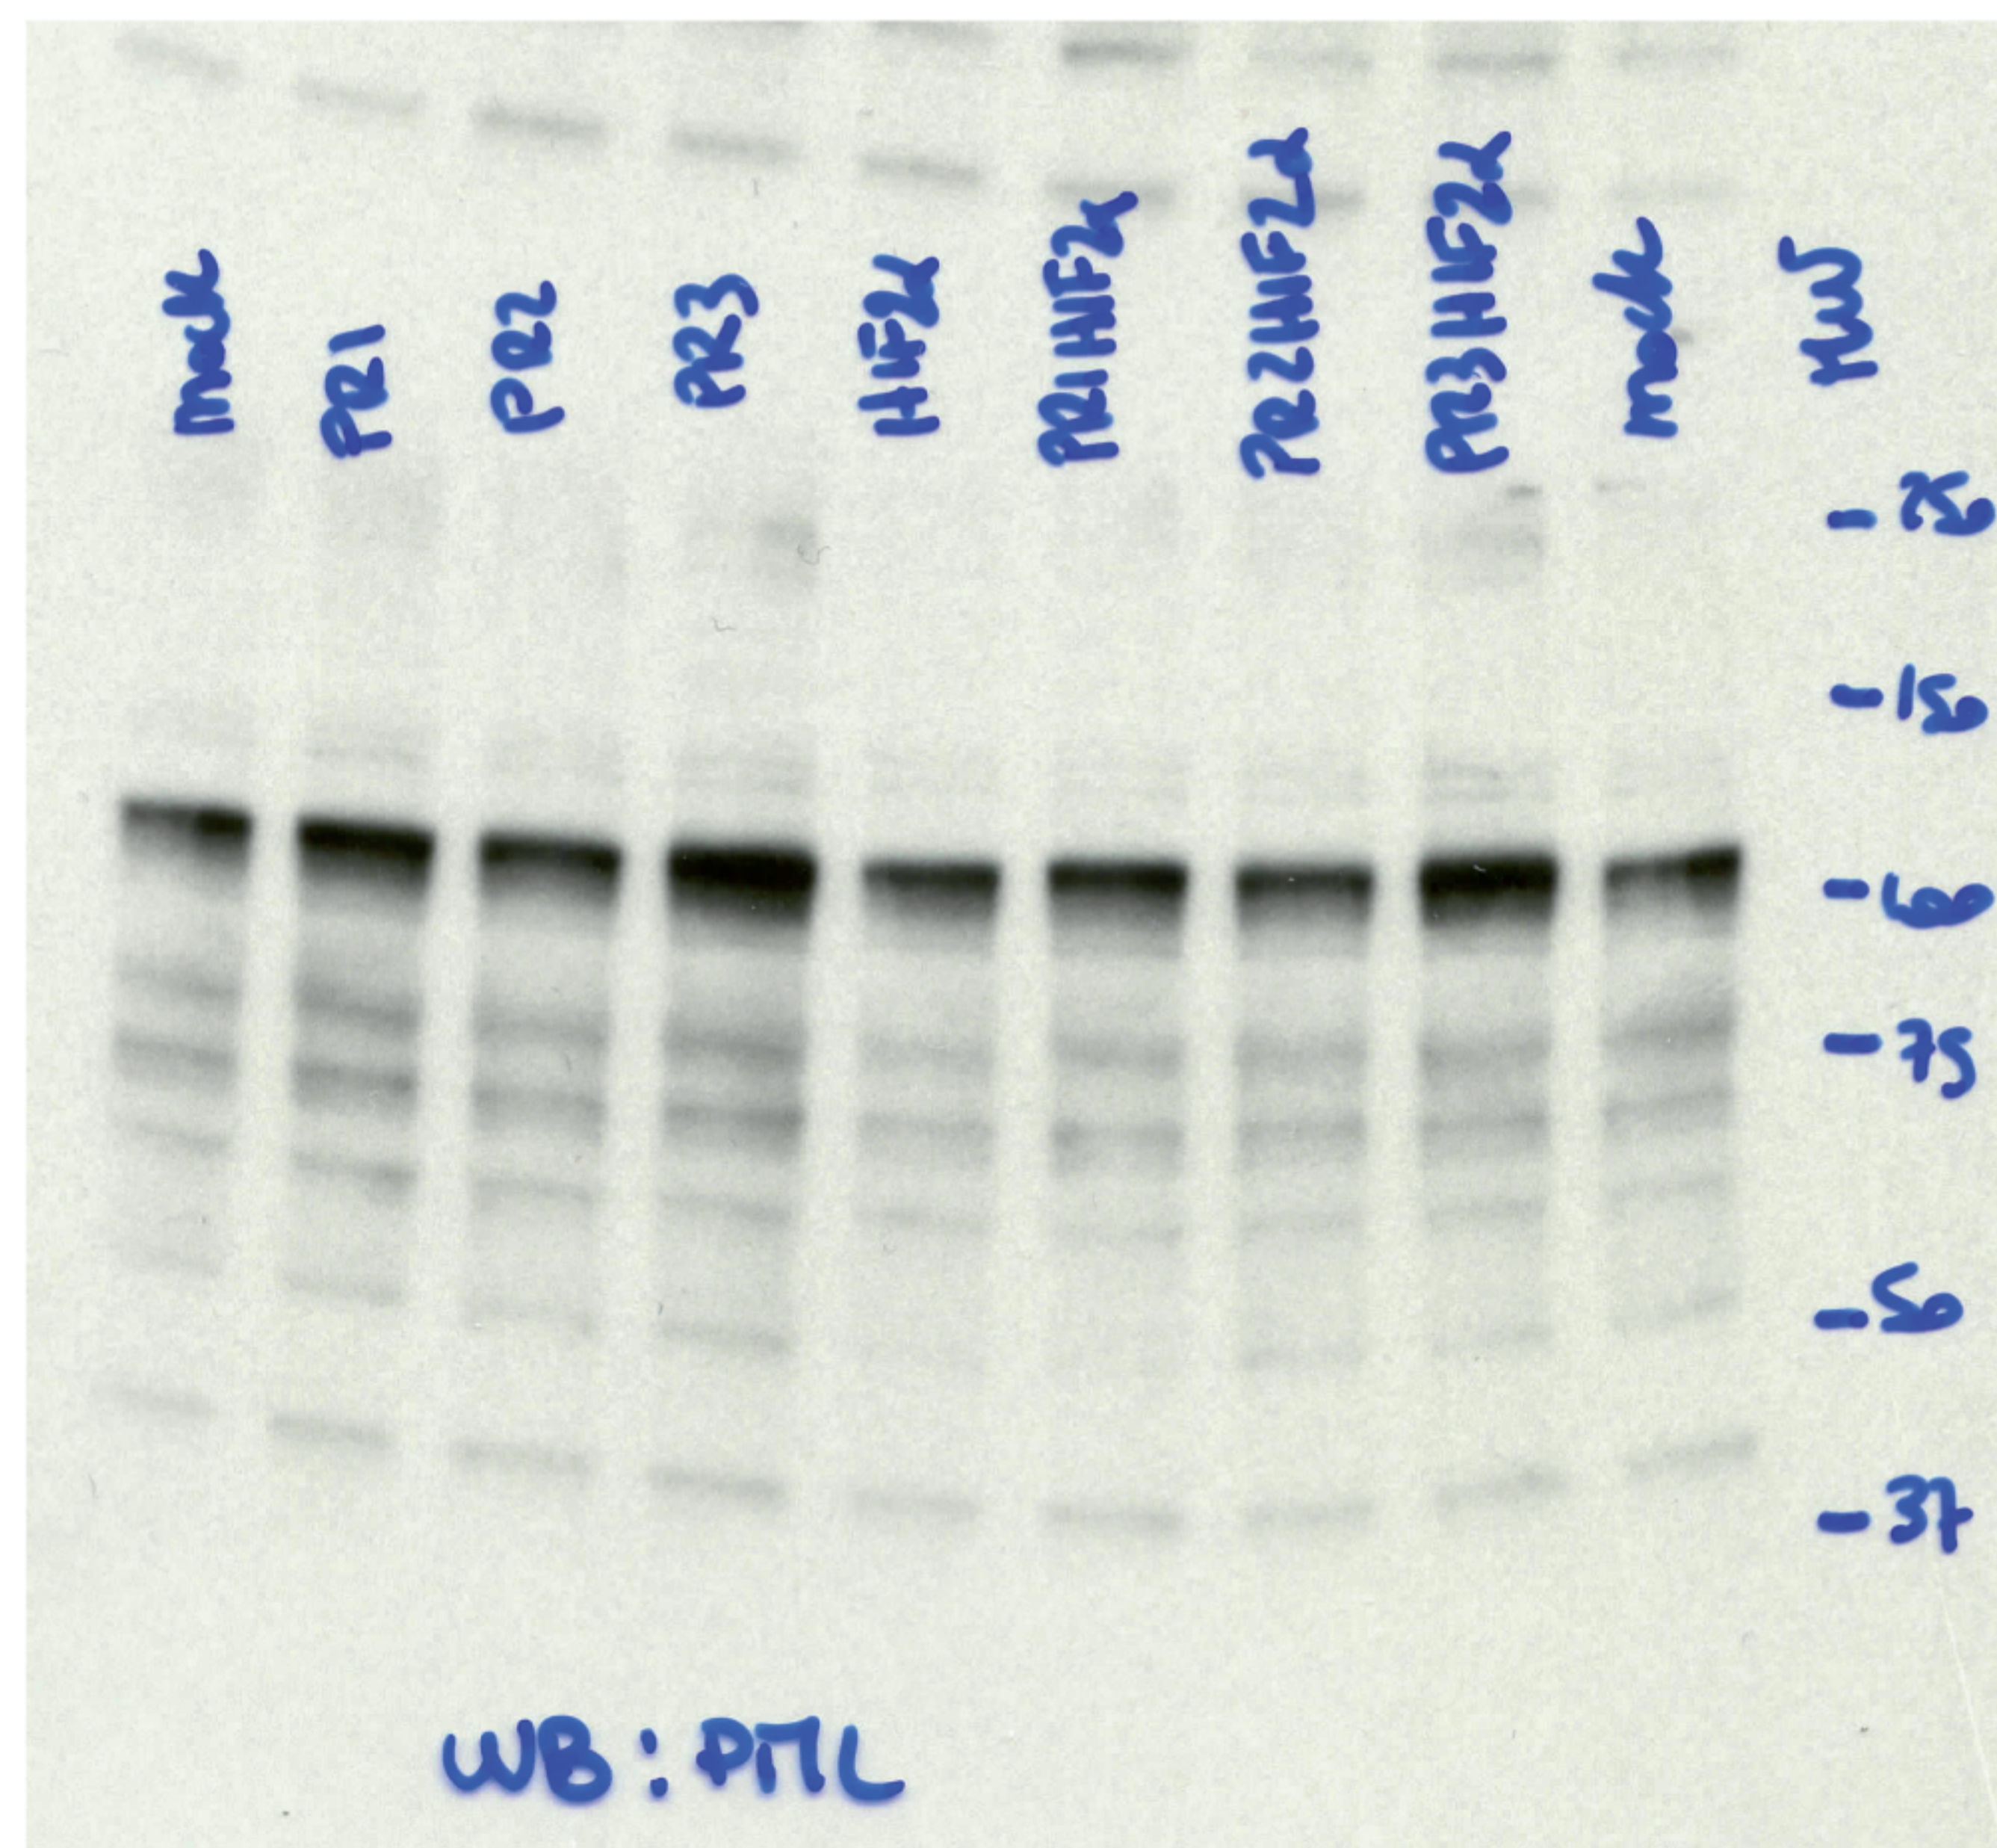

WB: anti-PML

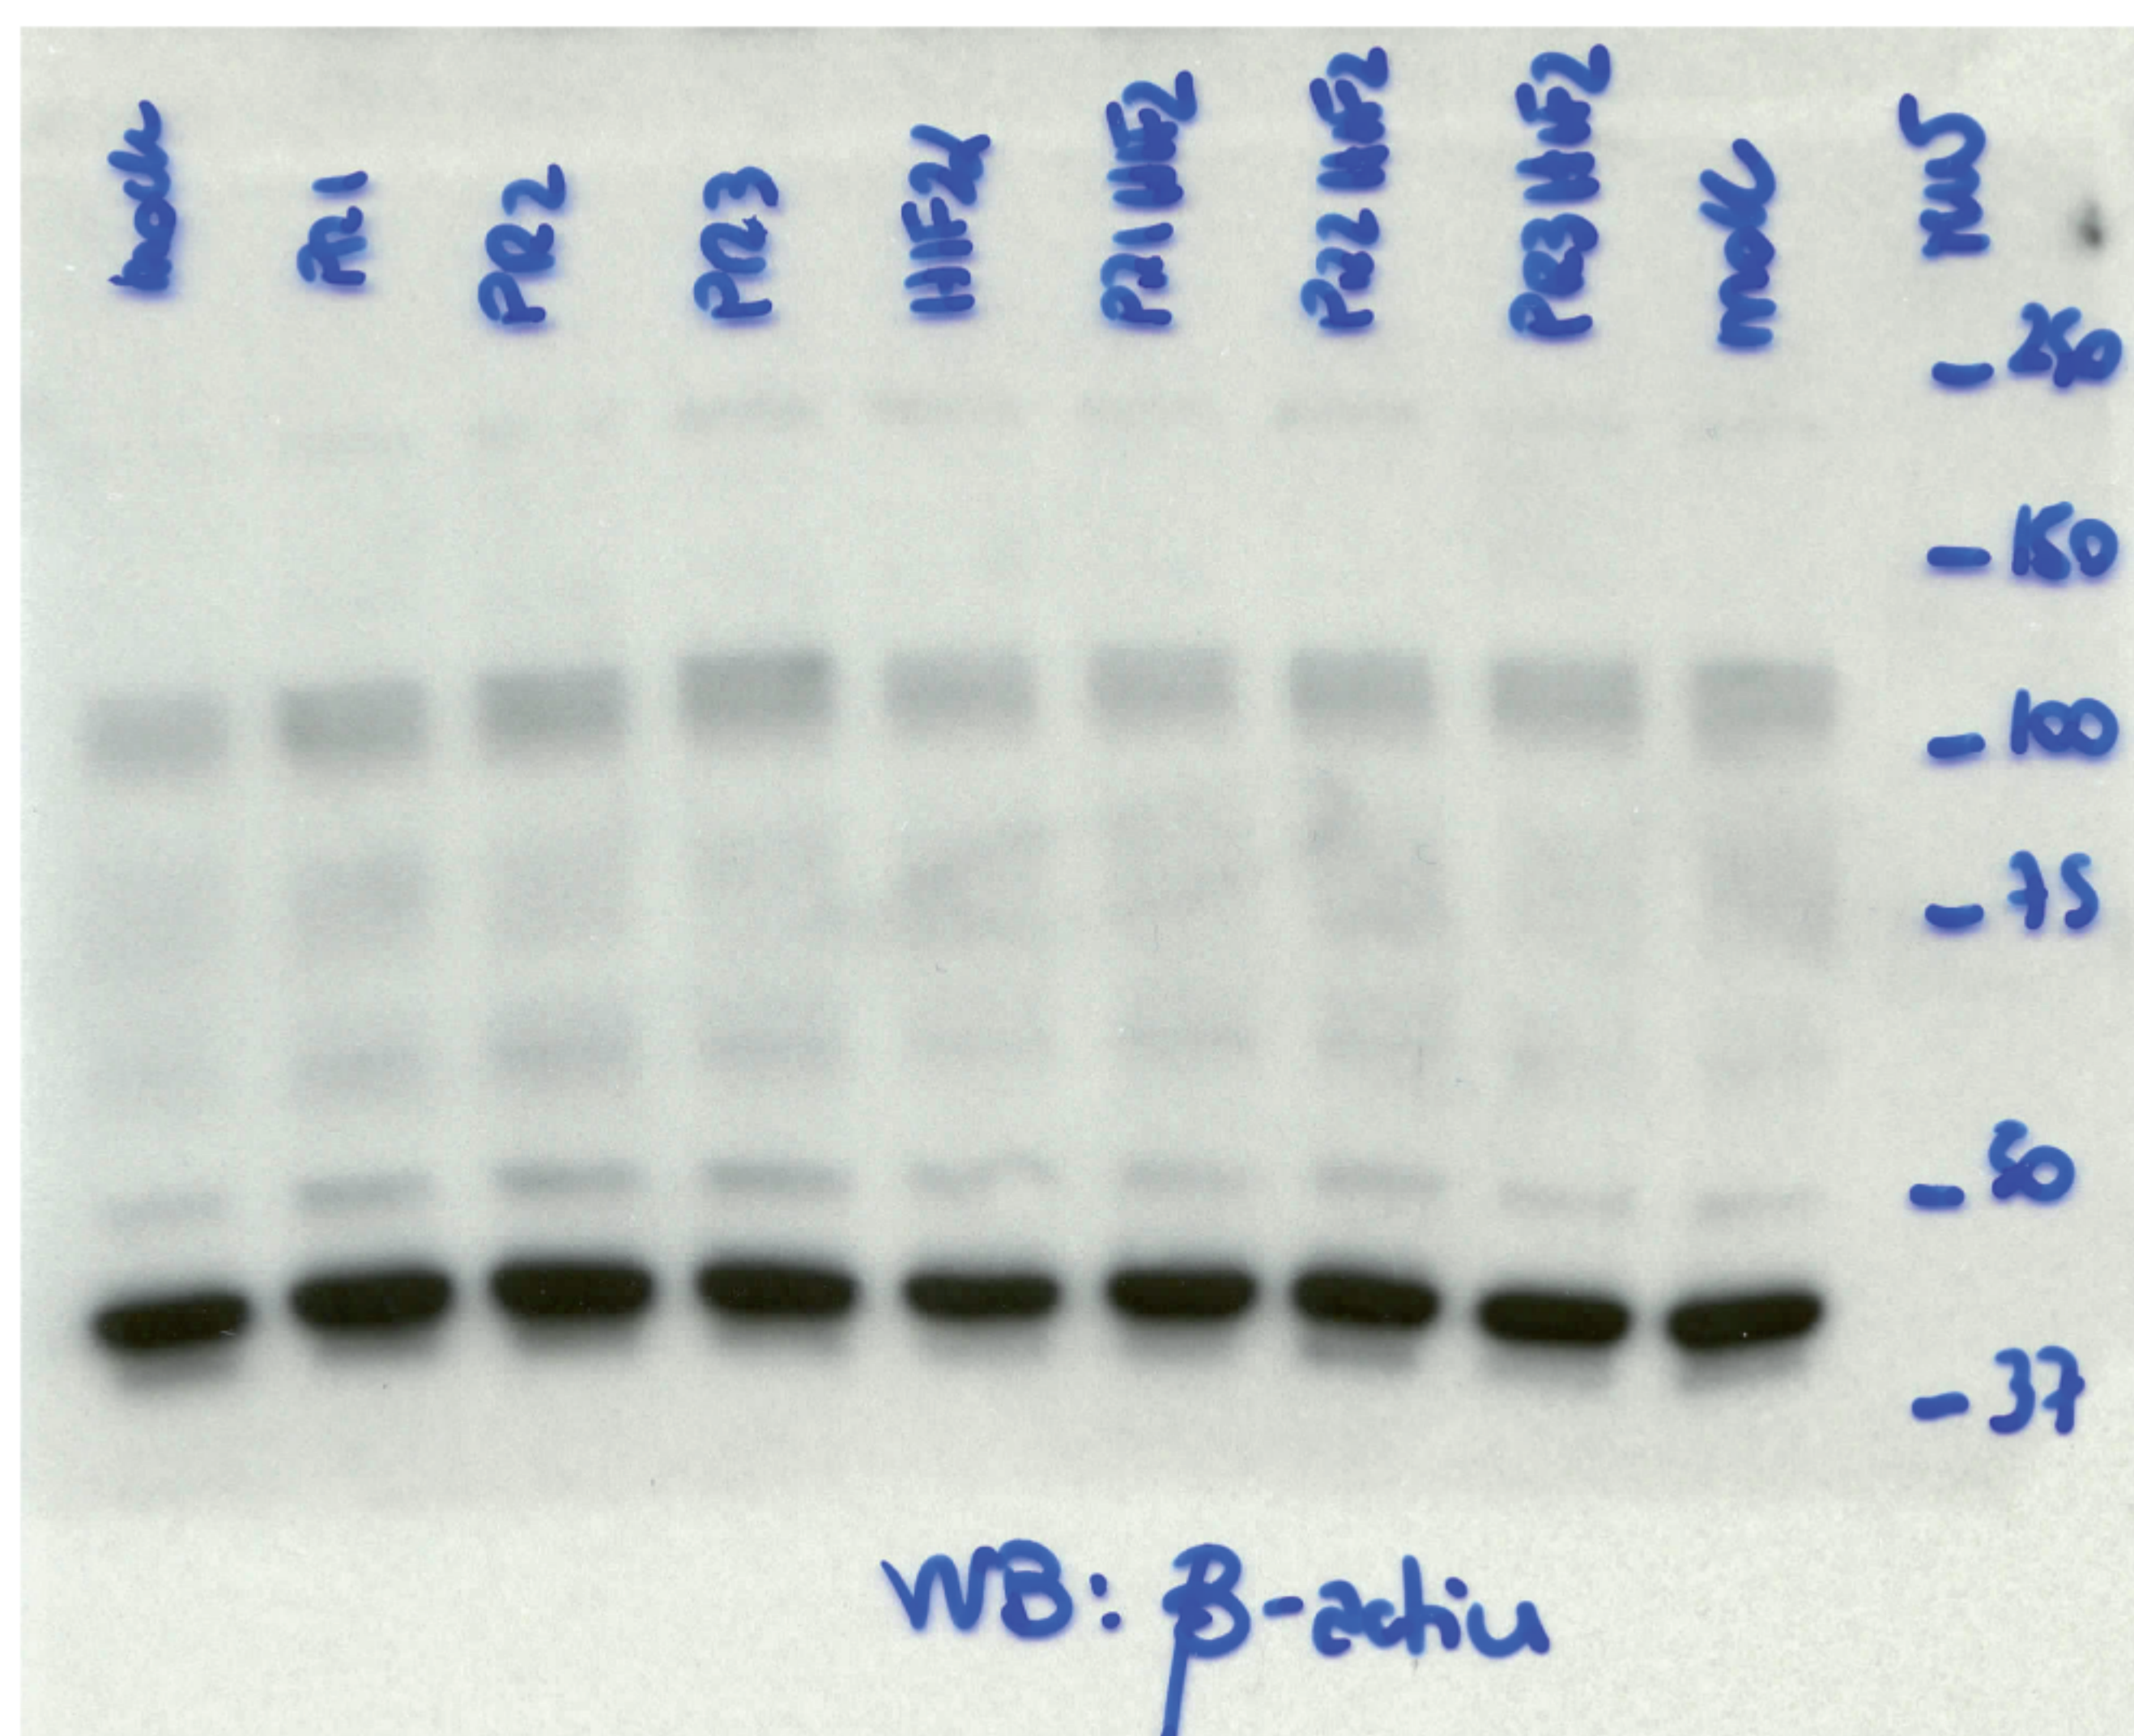

WB: anti-β-actin (after stripping)

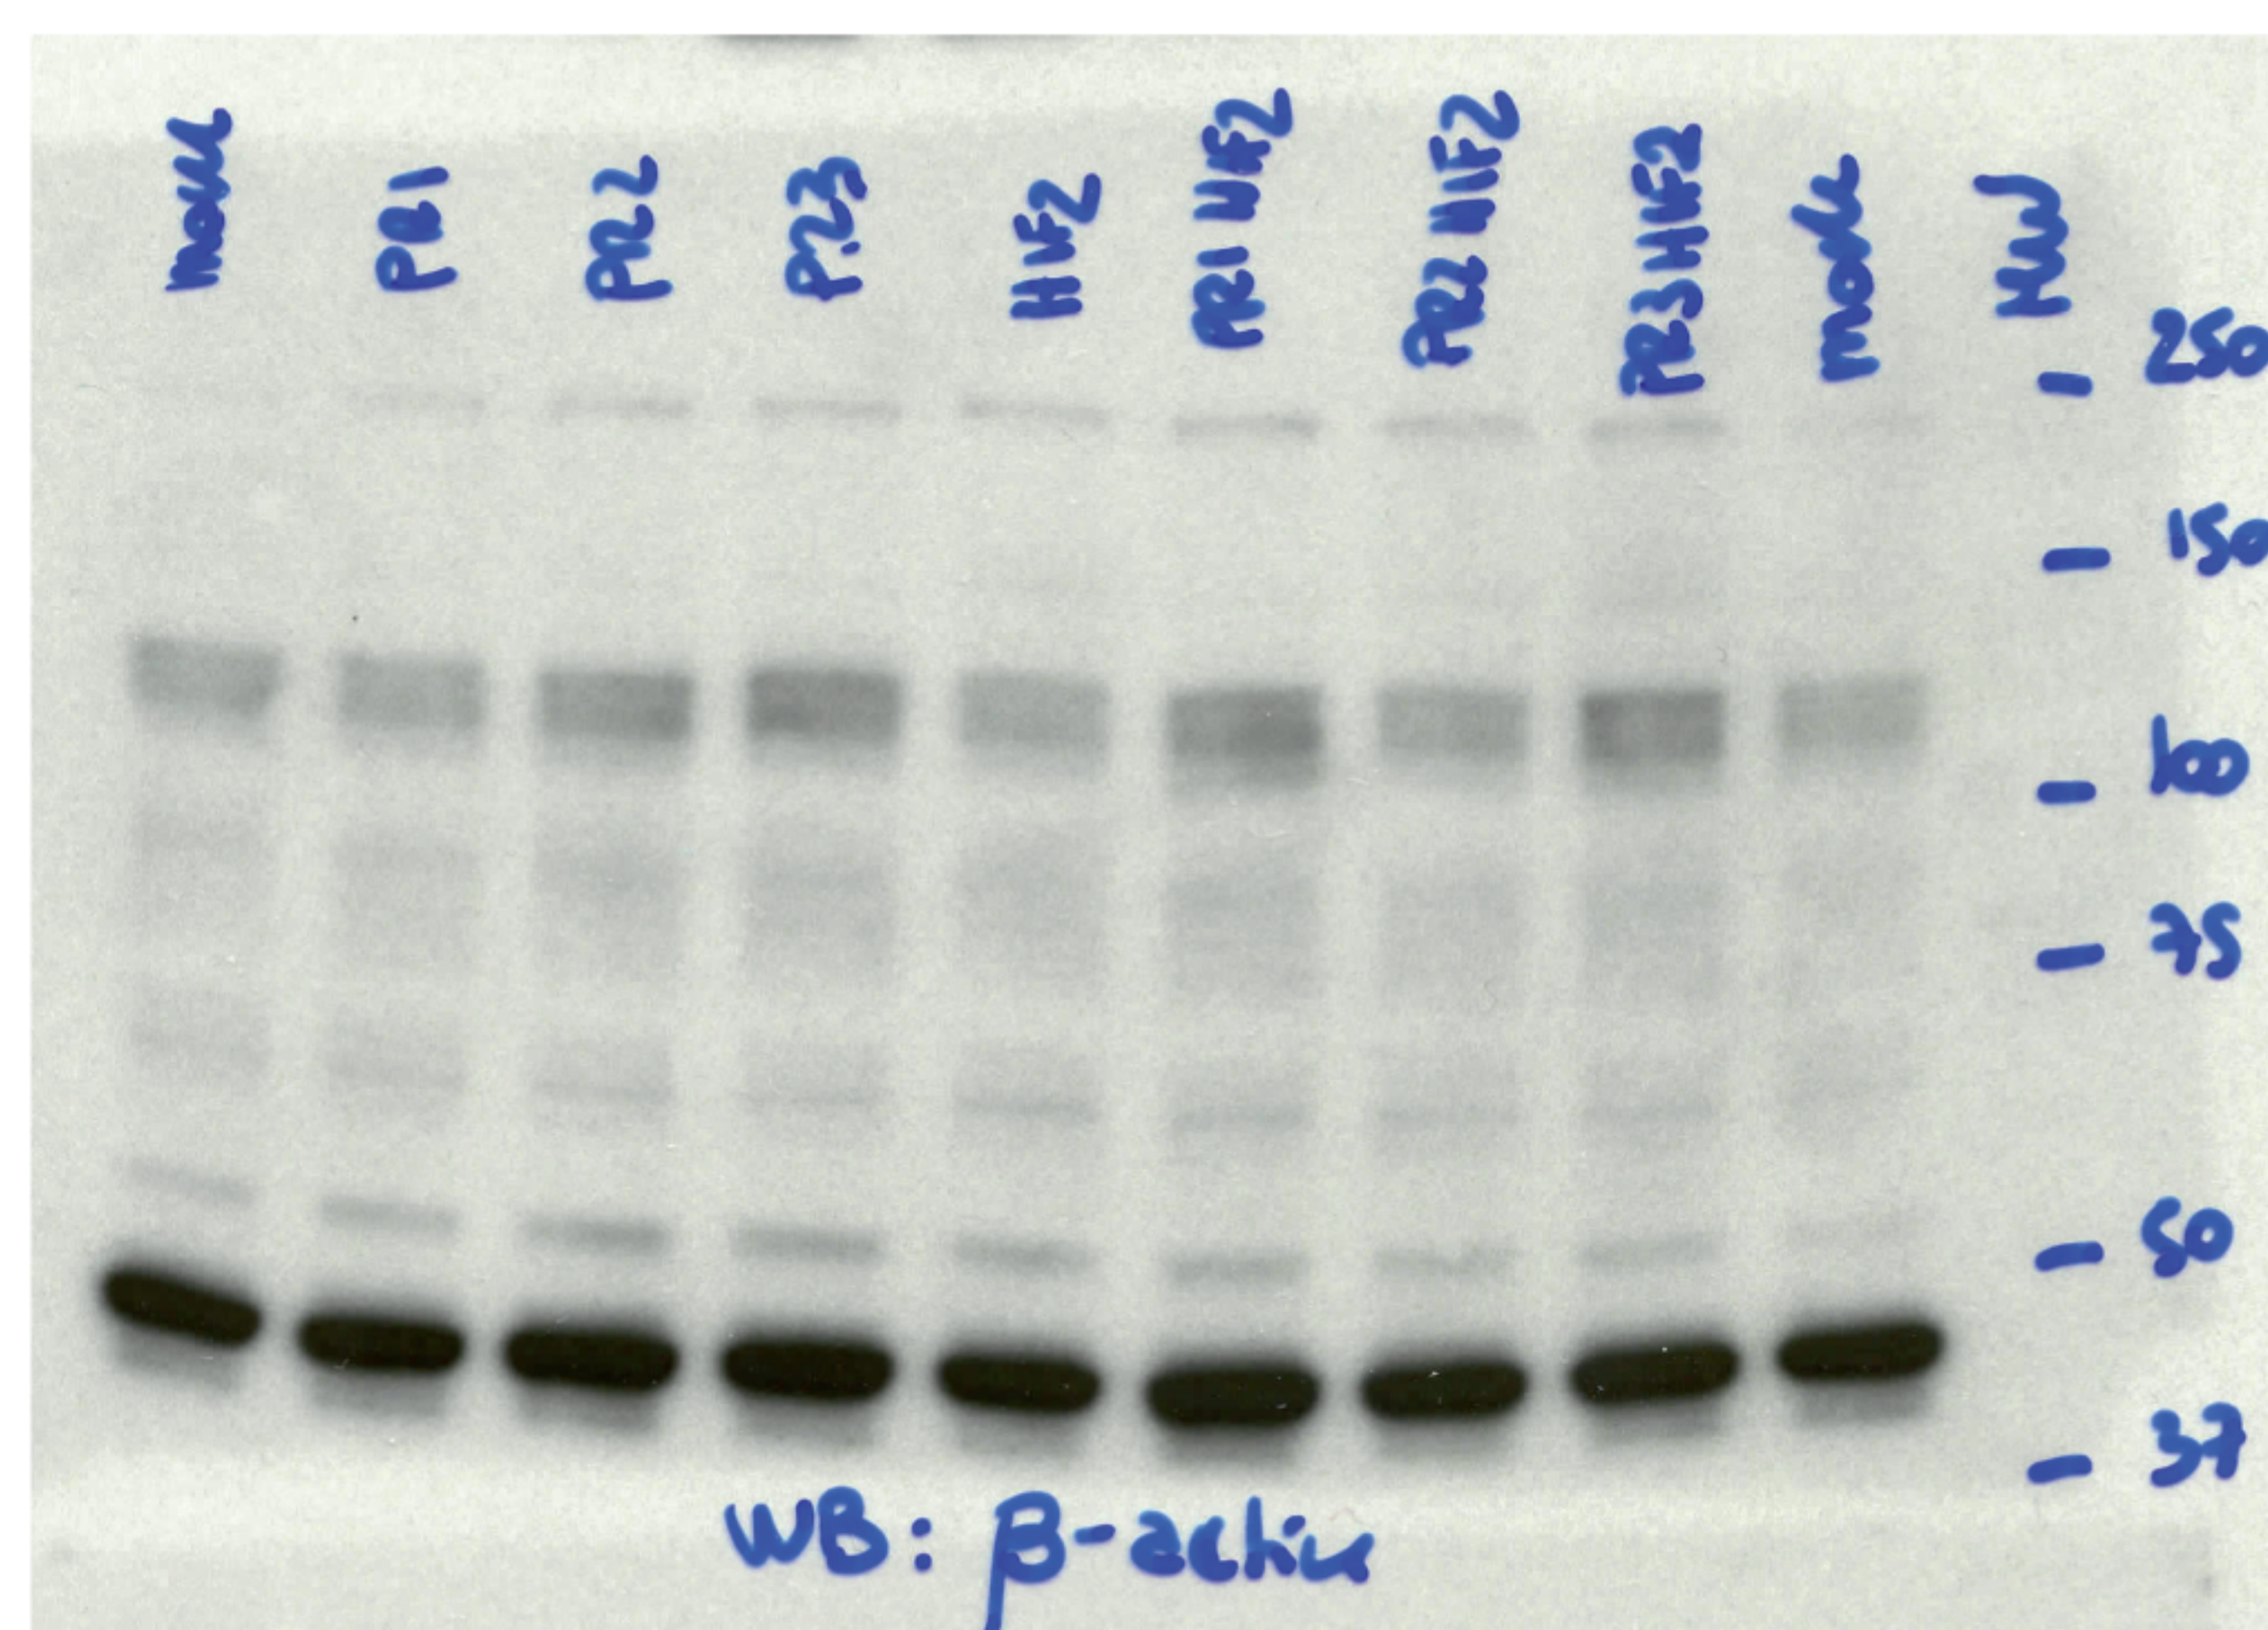

WB: anti-β-actin (after stripping)
