# Supplementary material for: HIF factors cooperate with PML-RARα to promote acute promyelocytic leukemia progression and relapse
Source: PubMed Central journal article supplement (PMC4023886; doi:10.1002/emmm.201303065), 2014-04-07
Supplement: emmm0006-0640-sd7.pdf [file emmm0006-0640-sd7.pdf]

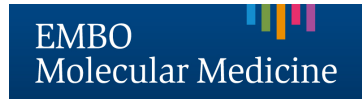

## **HIF factors cooperate with PML-RAR $\alpha$ to promote acute promyelocytic leukemia progression and relapse**

Nadia Coltella, Stefano Percio, Roberta Valsecchi, Roberto Cuttano, Jlenia Guarnerio, Maurilio Ponzoni, Pier Paolo Pandolfi, Giovanni Melillo, Linda Pattini and Rosa Bernardi

*Corresponding author: Rosa Bernardi, San Raffaele Scientific Institute*

---

### **Review timeline:**

Submission date:  
Accepted:

21 May 2013  
28 February 2014

---

*Editor: Roberto Buccione*

### **Transaction Report:**

No Peer Review Process File is available with this article, as the authors have chosen not to make the review process public in this case.
