# Supplementary material for: HIF factors cooperate with PML-RARα to promote acute promyelocytic leukemia progression and relapse
Source: PubMed Central journal article supplement (PMC4023886; doi:10.1002/emmm.201303065), 2014-04-07
Supplement: emmm0006-0640-sd8.pdf [file emmm0006-0640-sd8.pdf]

Figure 1 Panel E (Left Upper Panel)

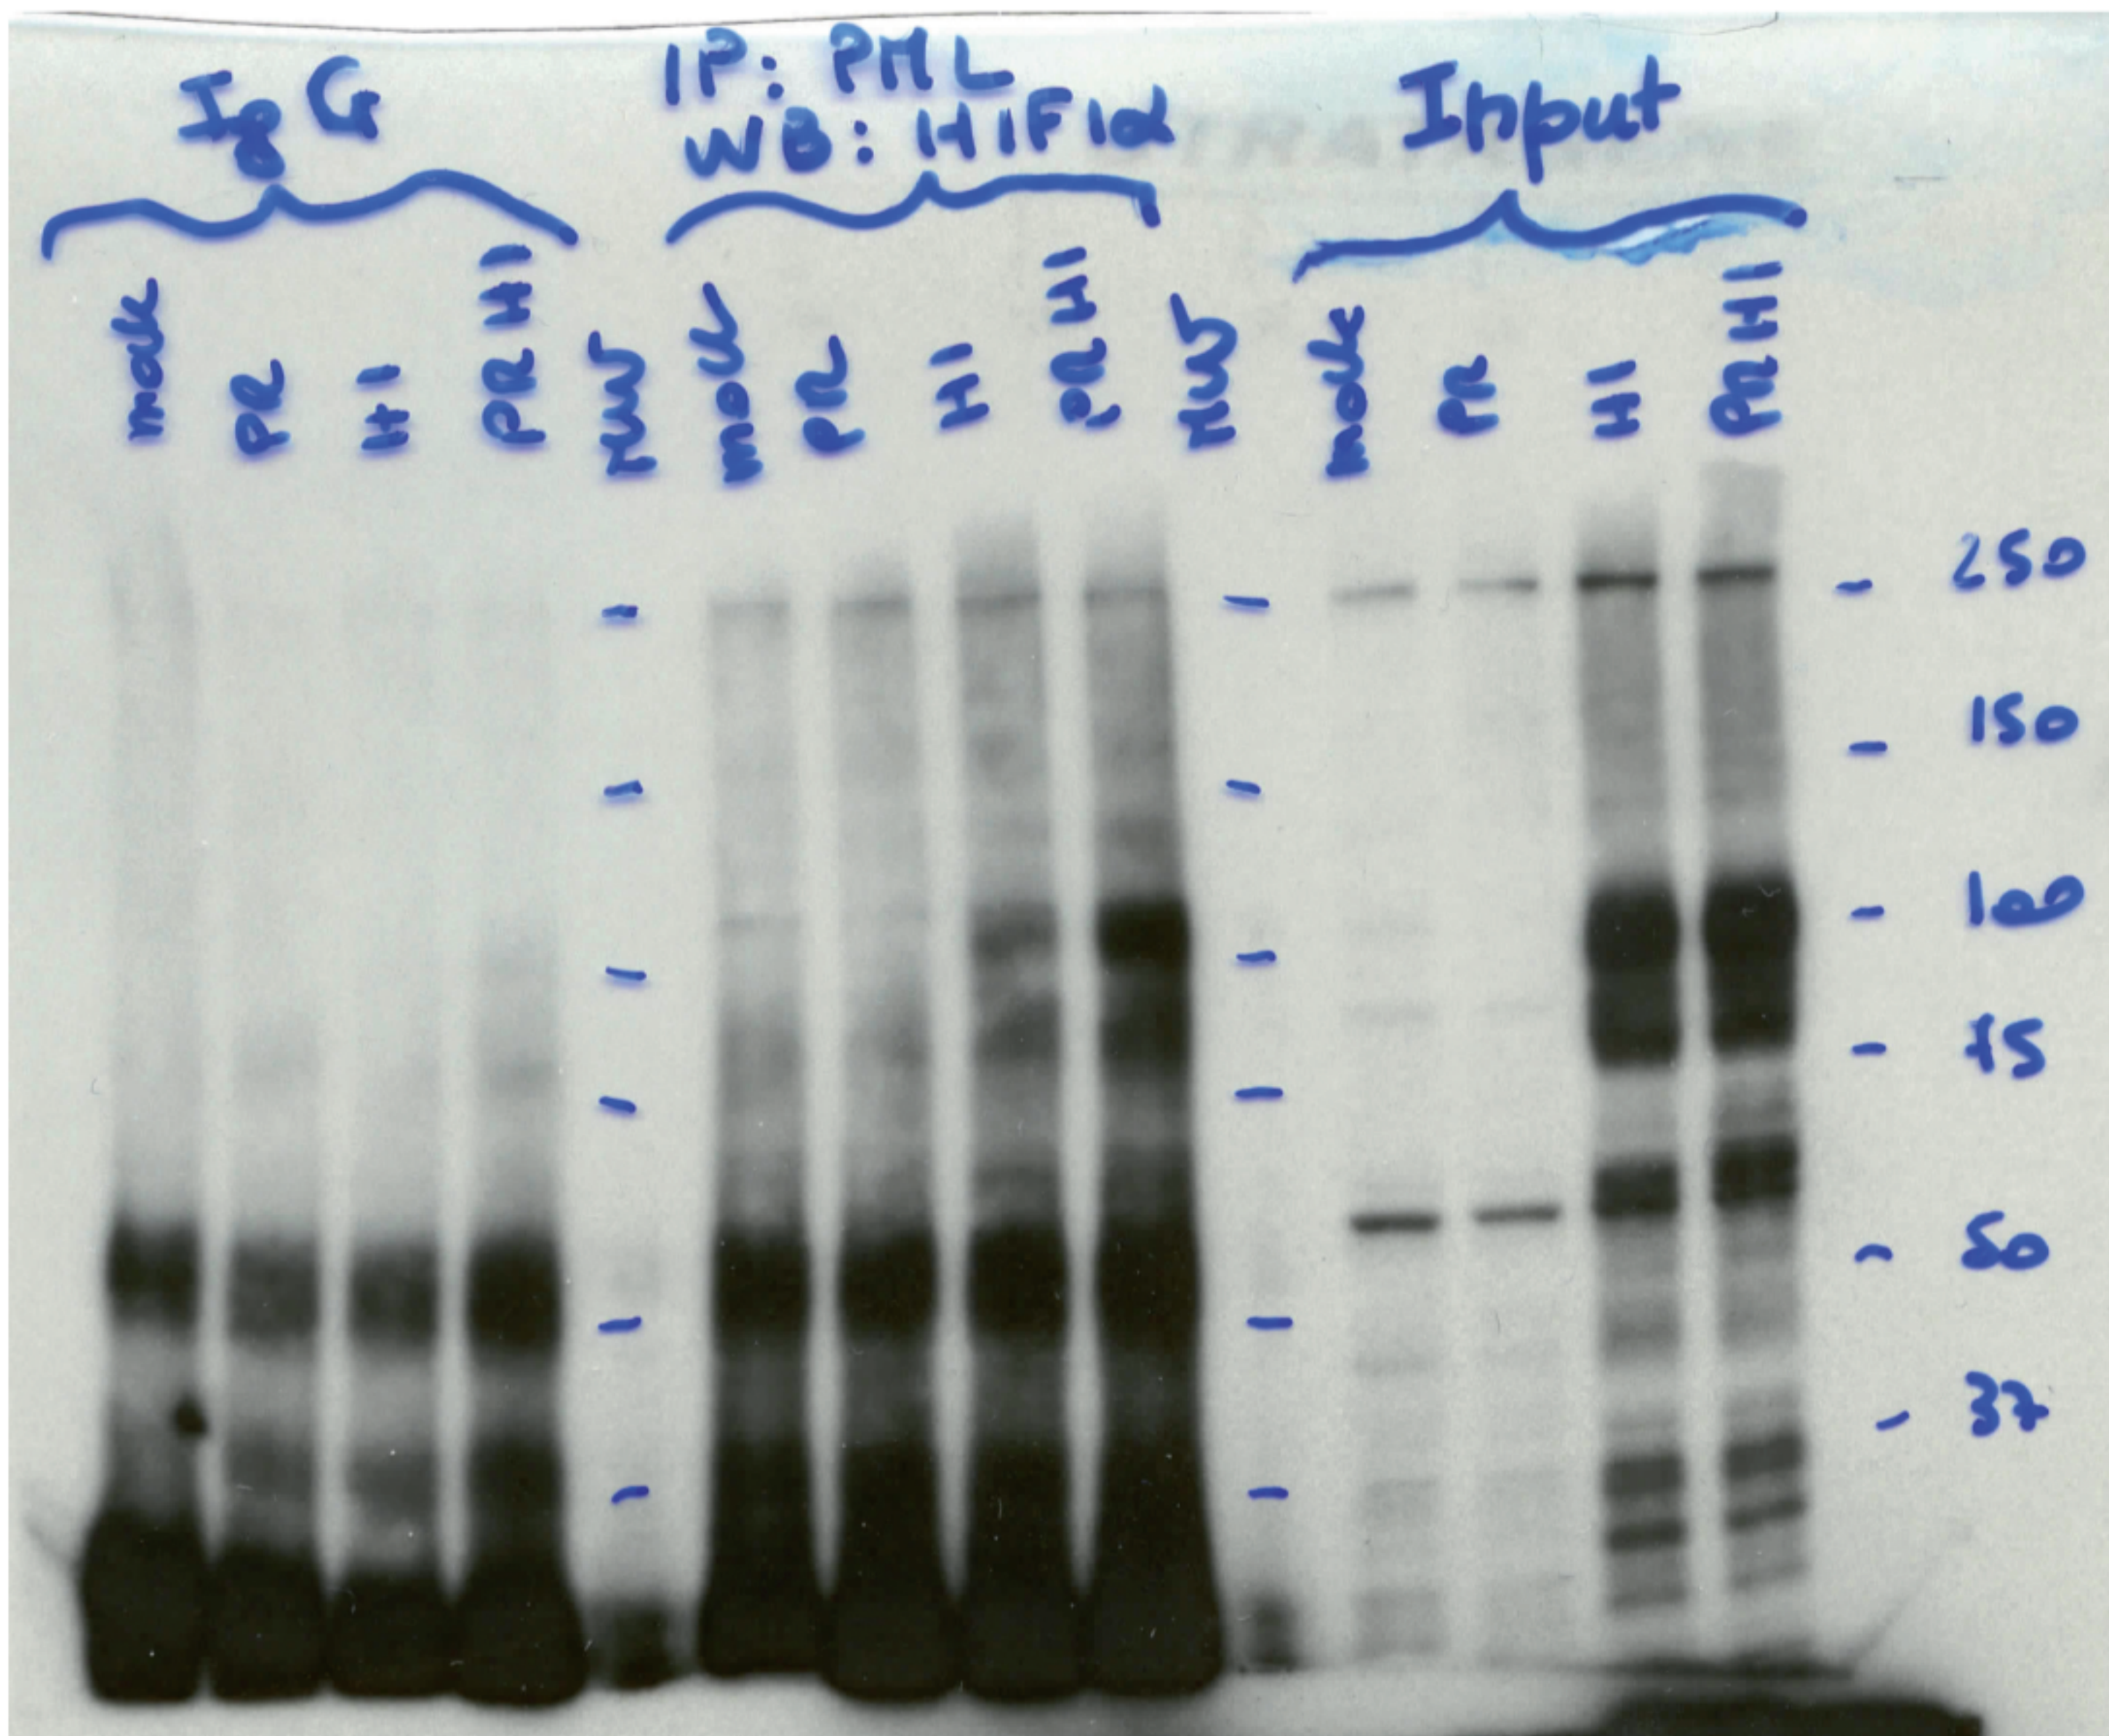

Figure 1 Panel E (Left Lower Panel)

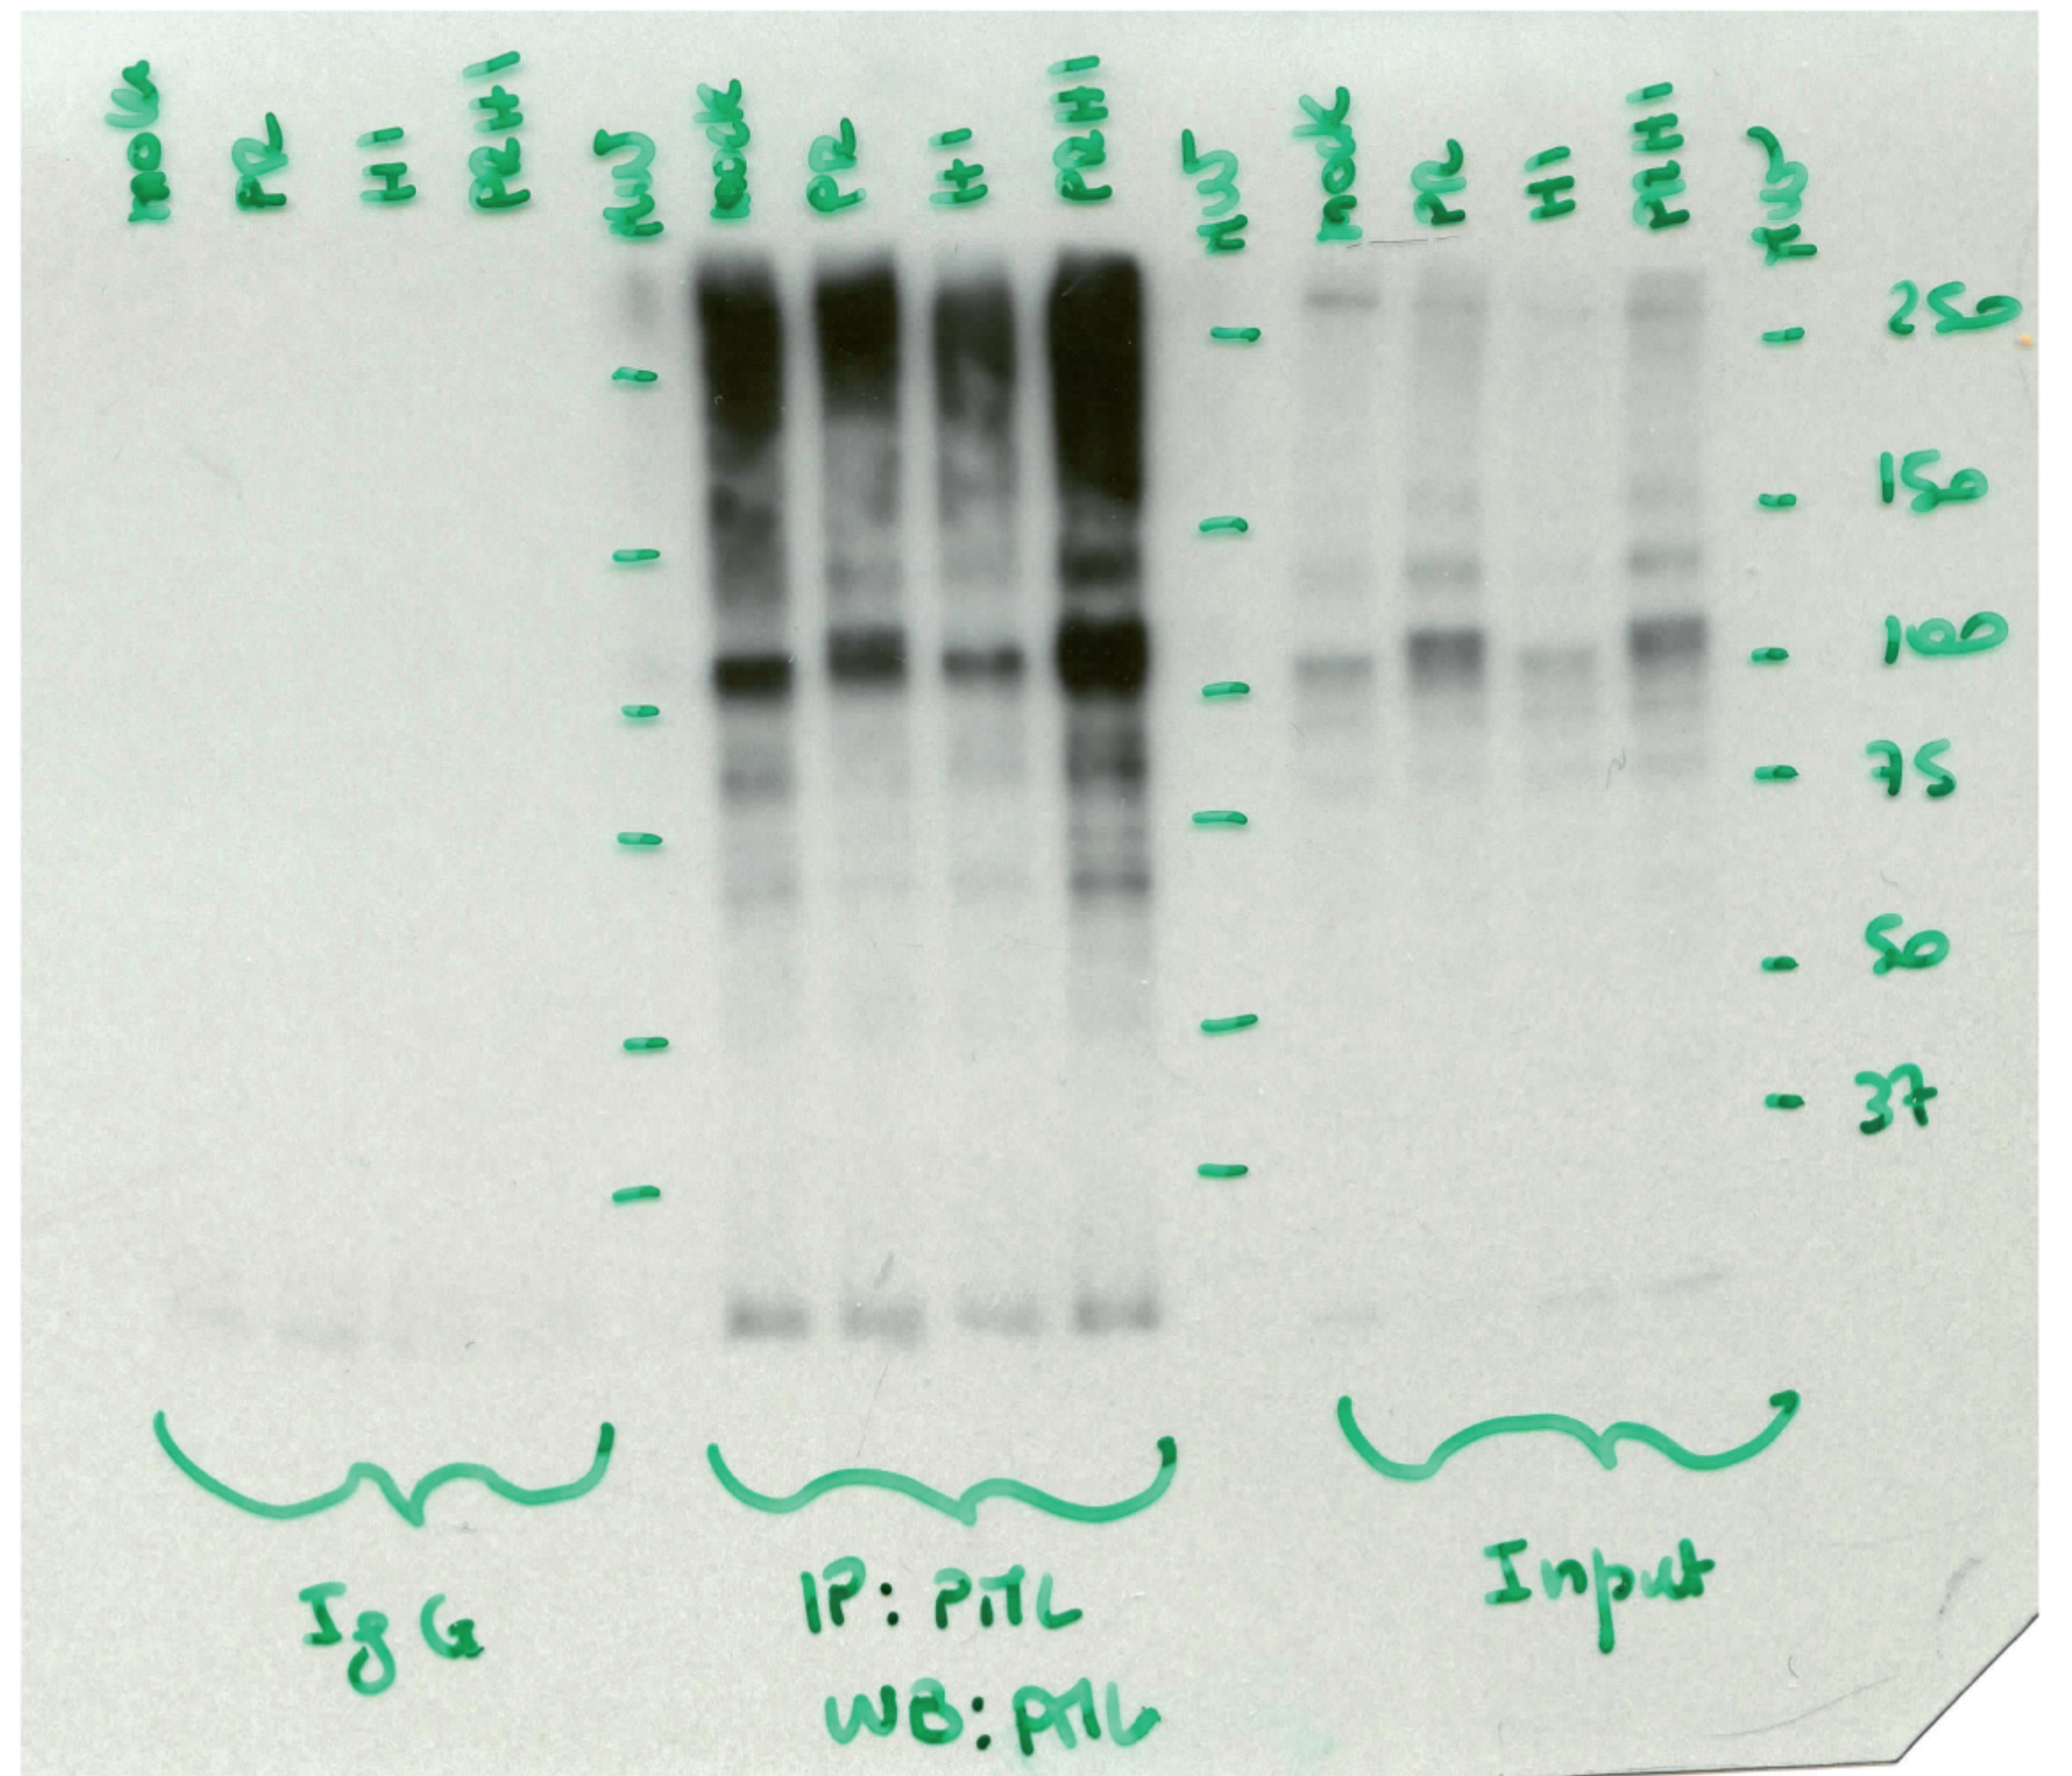

Figure 1 Panel E (Right Upper Panel)

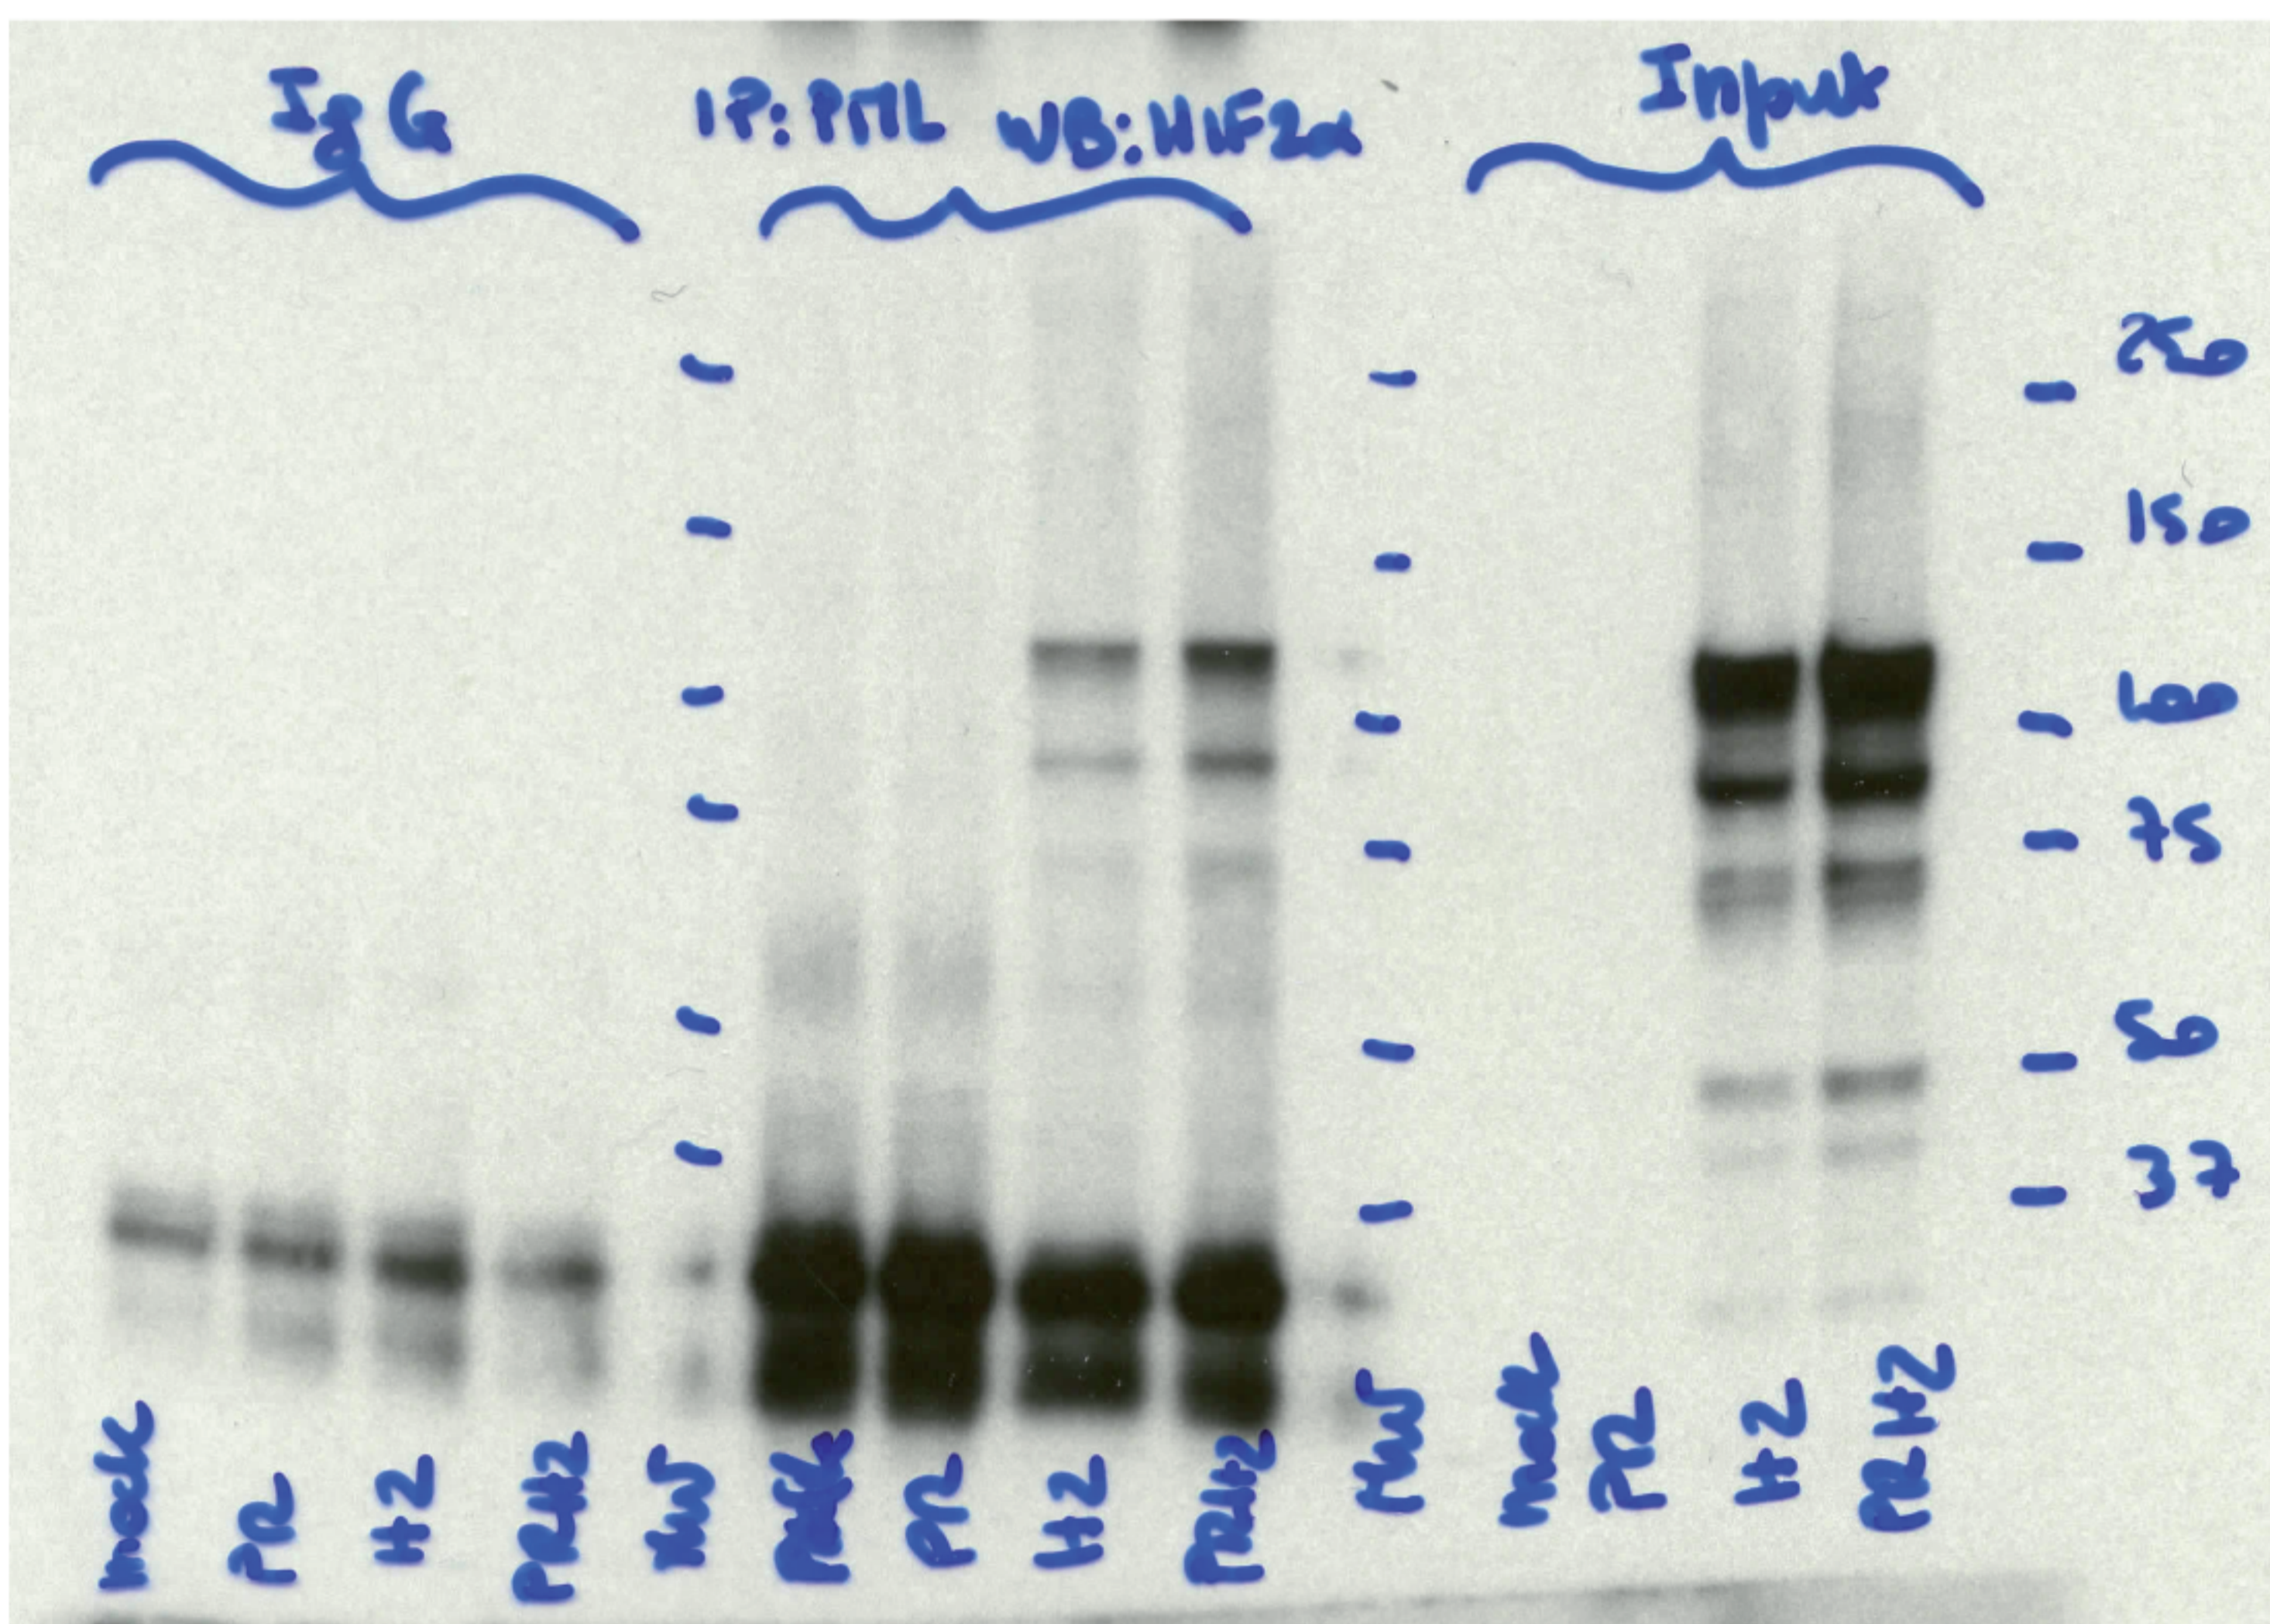

Figure 1 Panel E (Right Lower Panel)

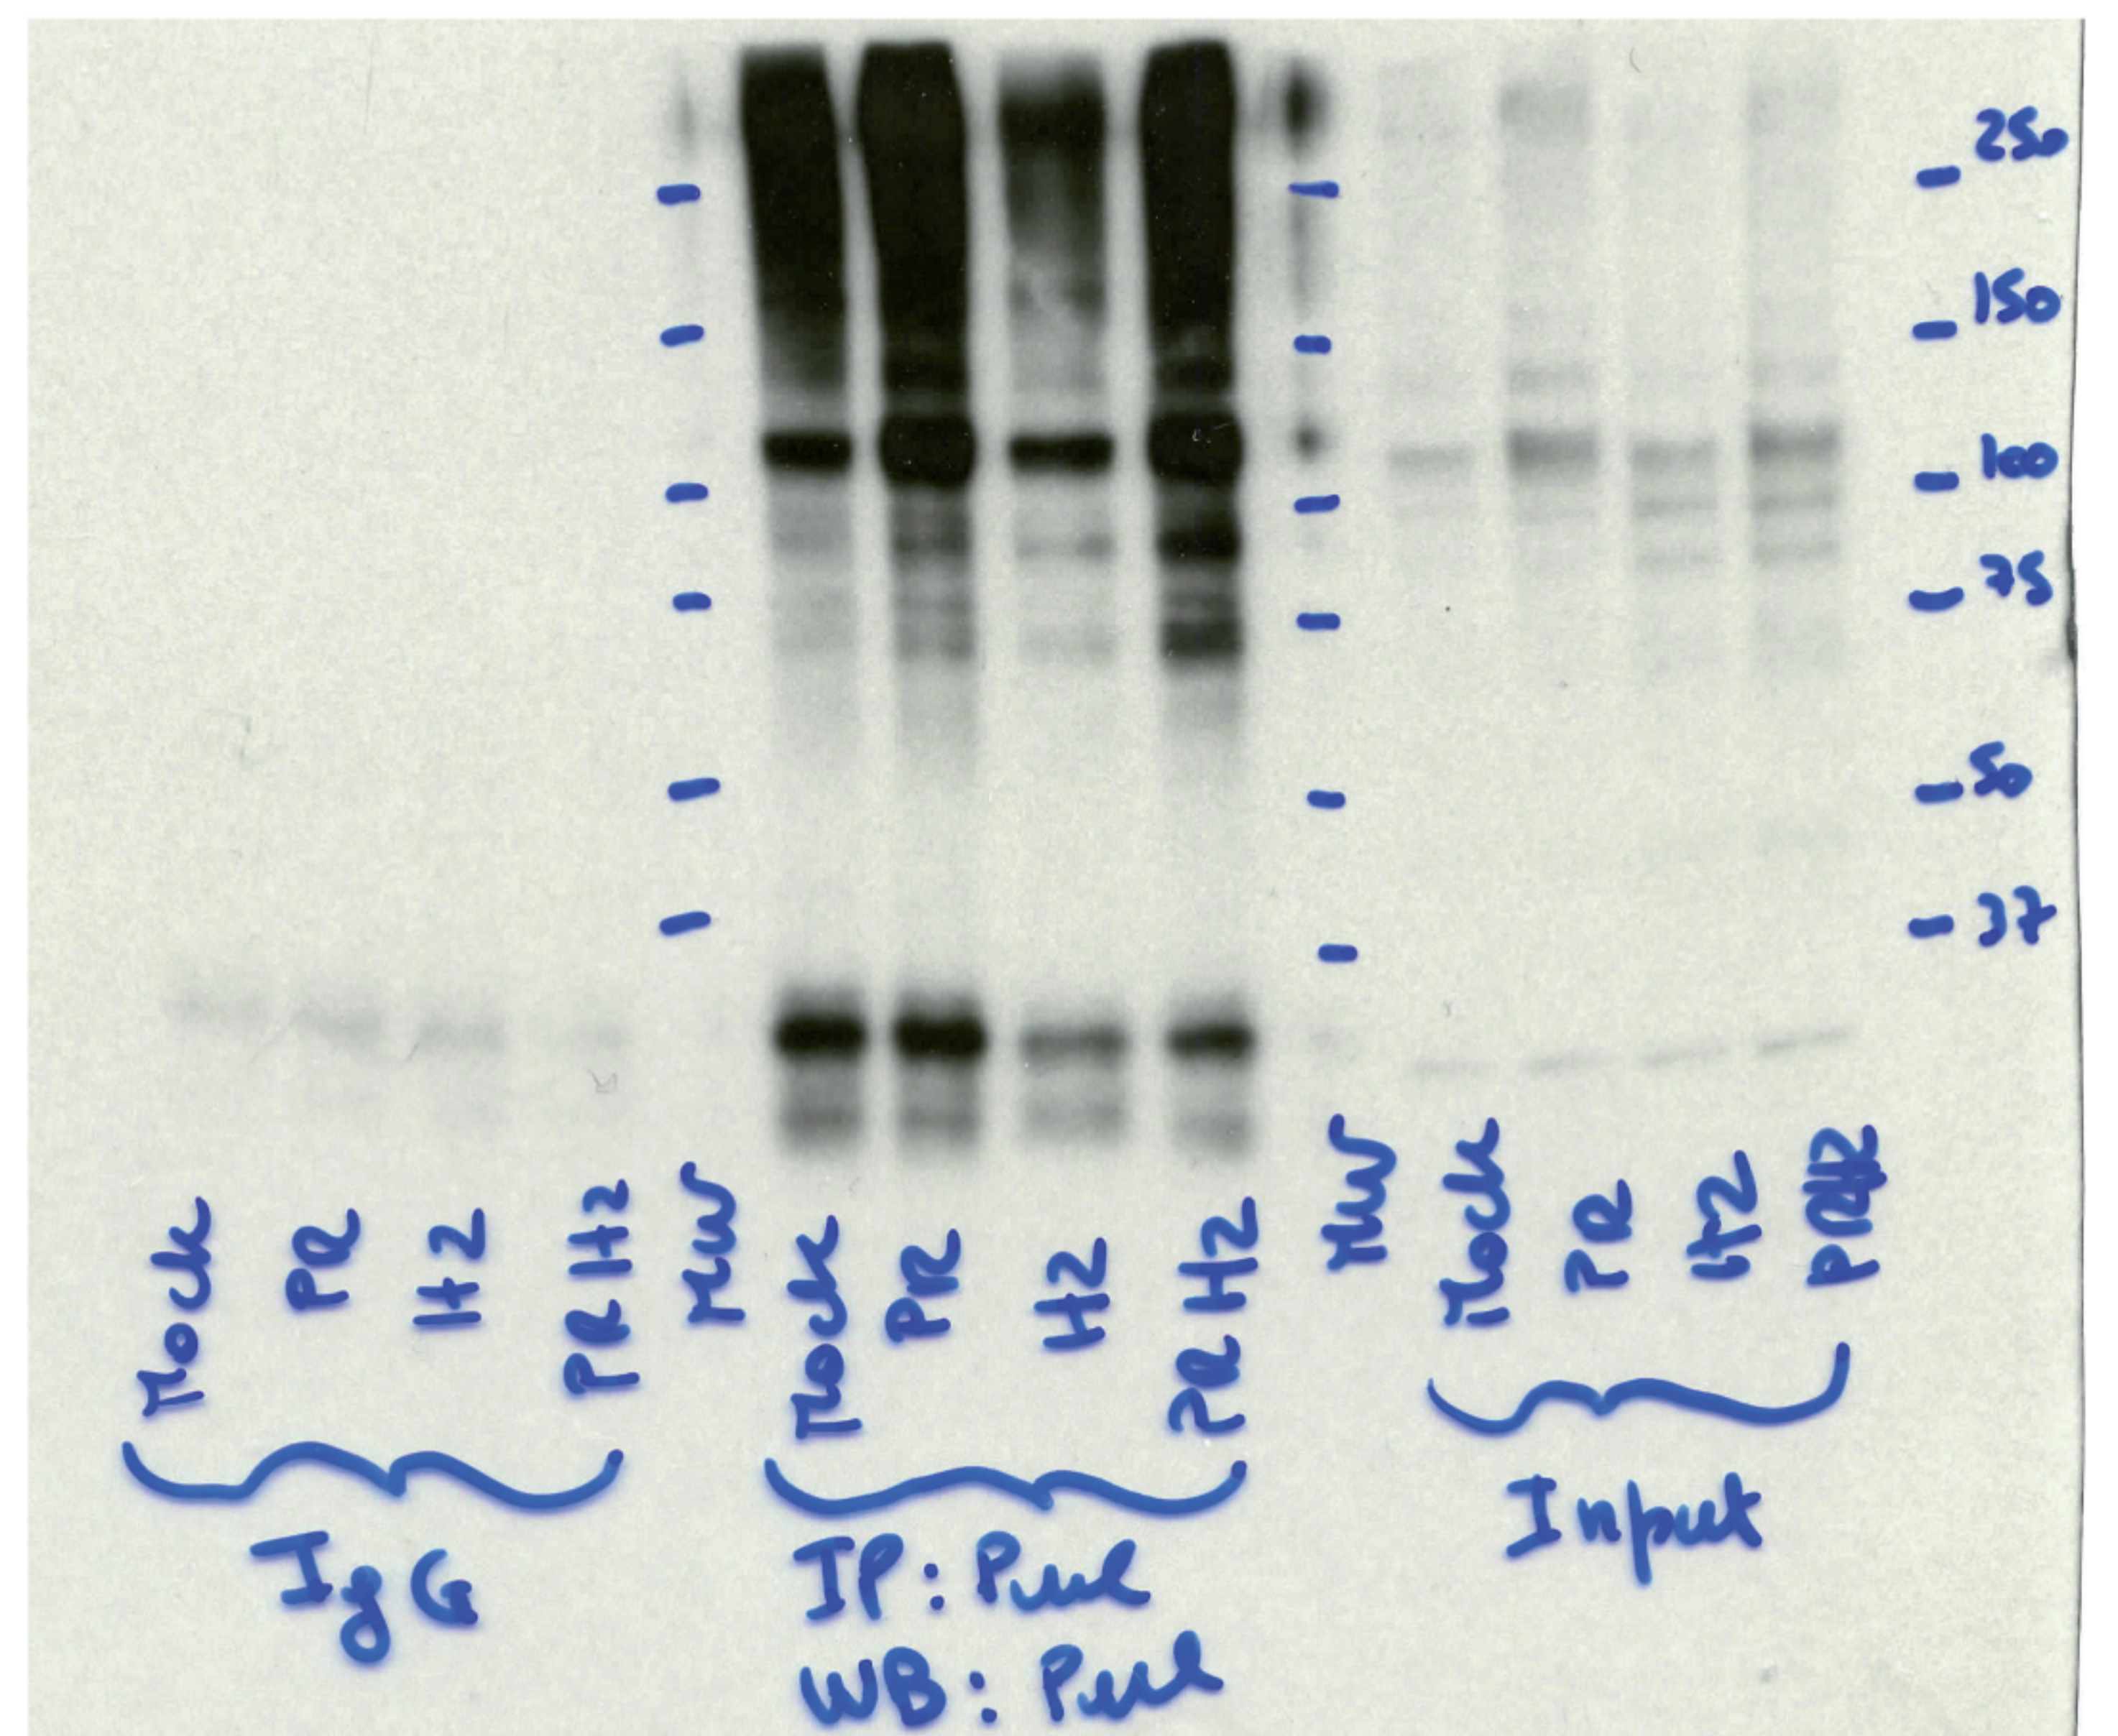

Figure 1 Panel F (Left Panel)

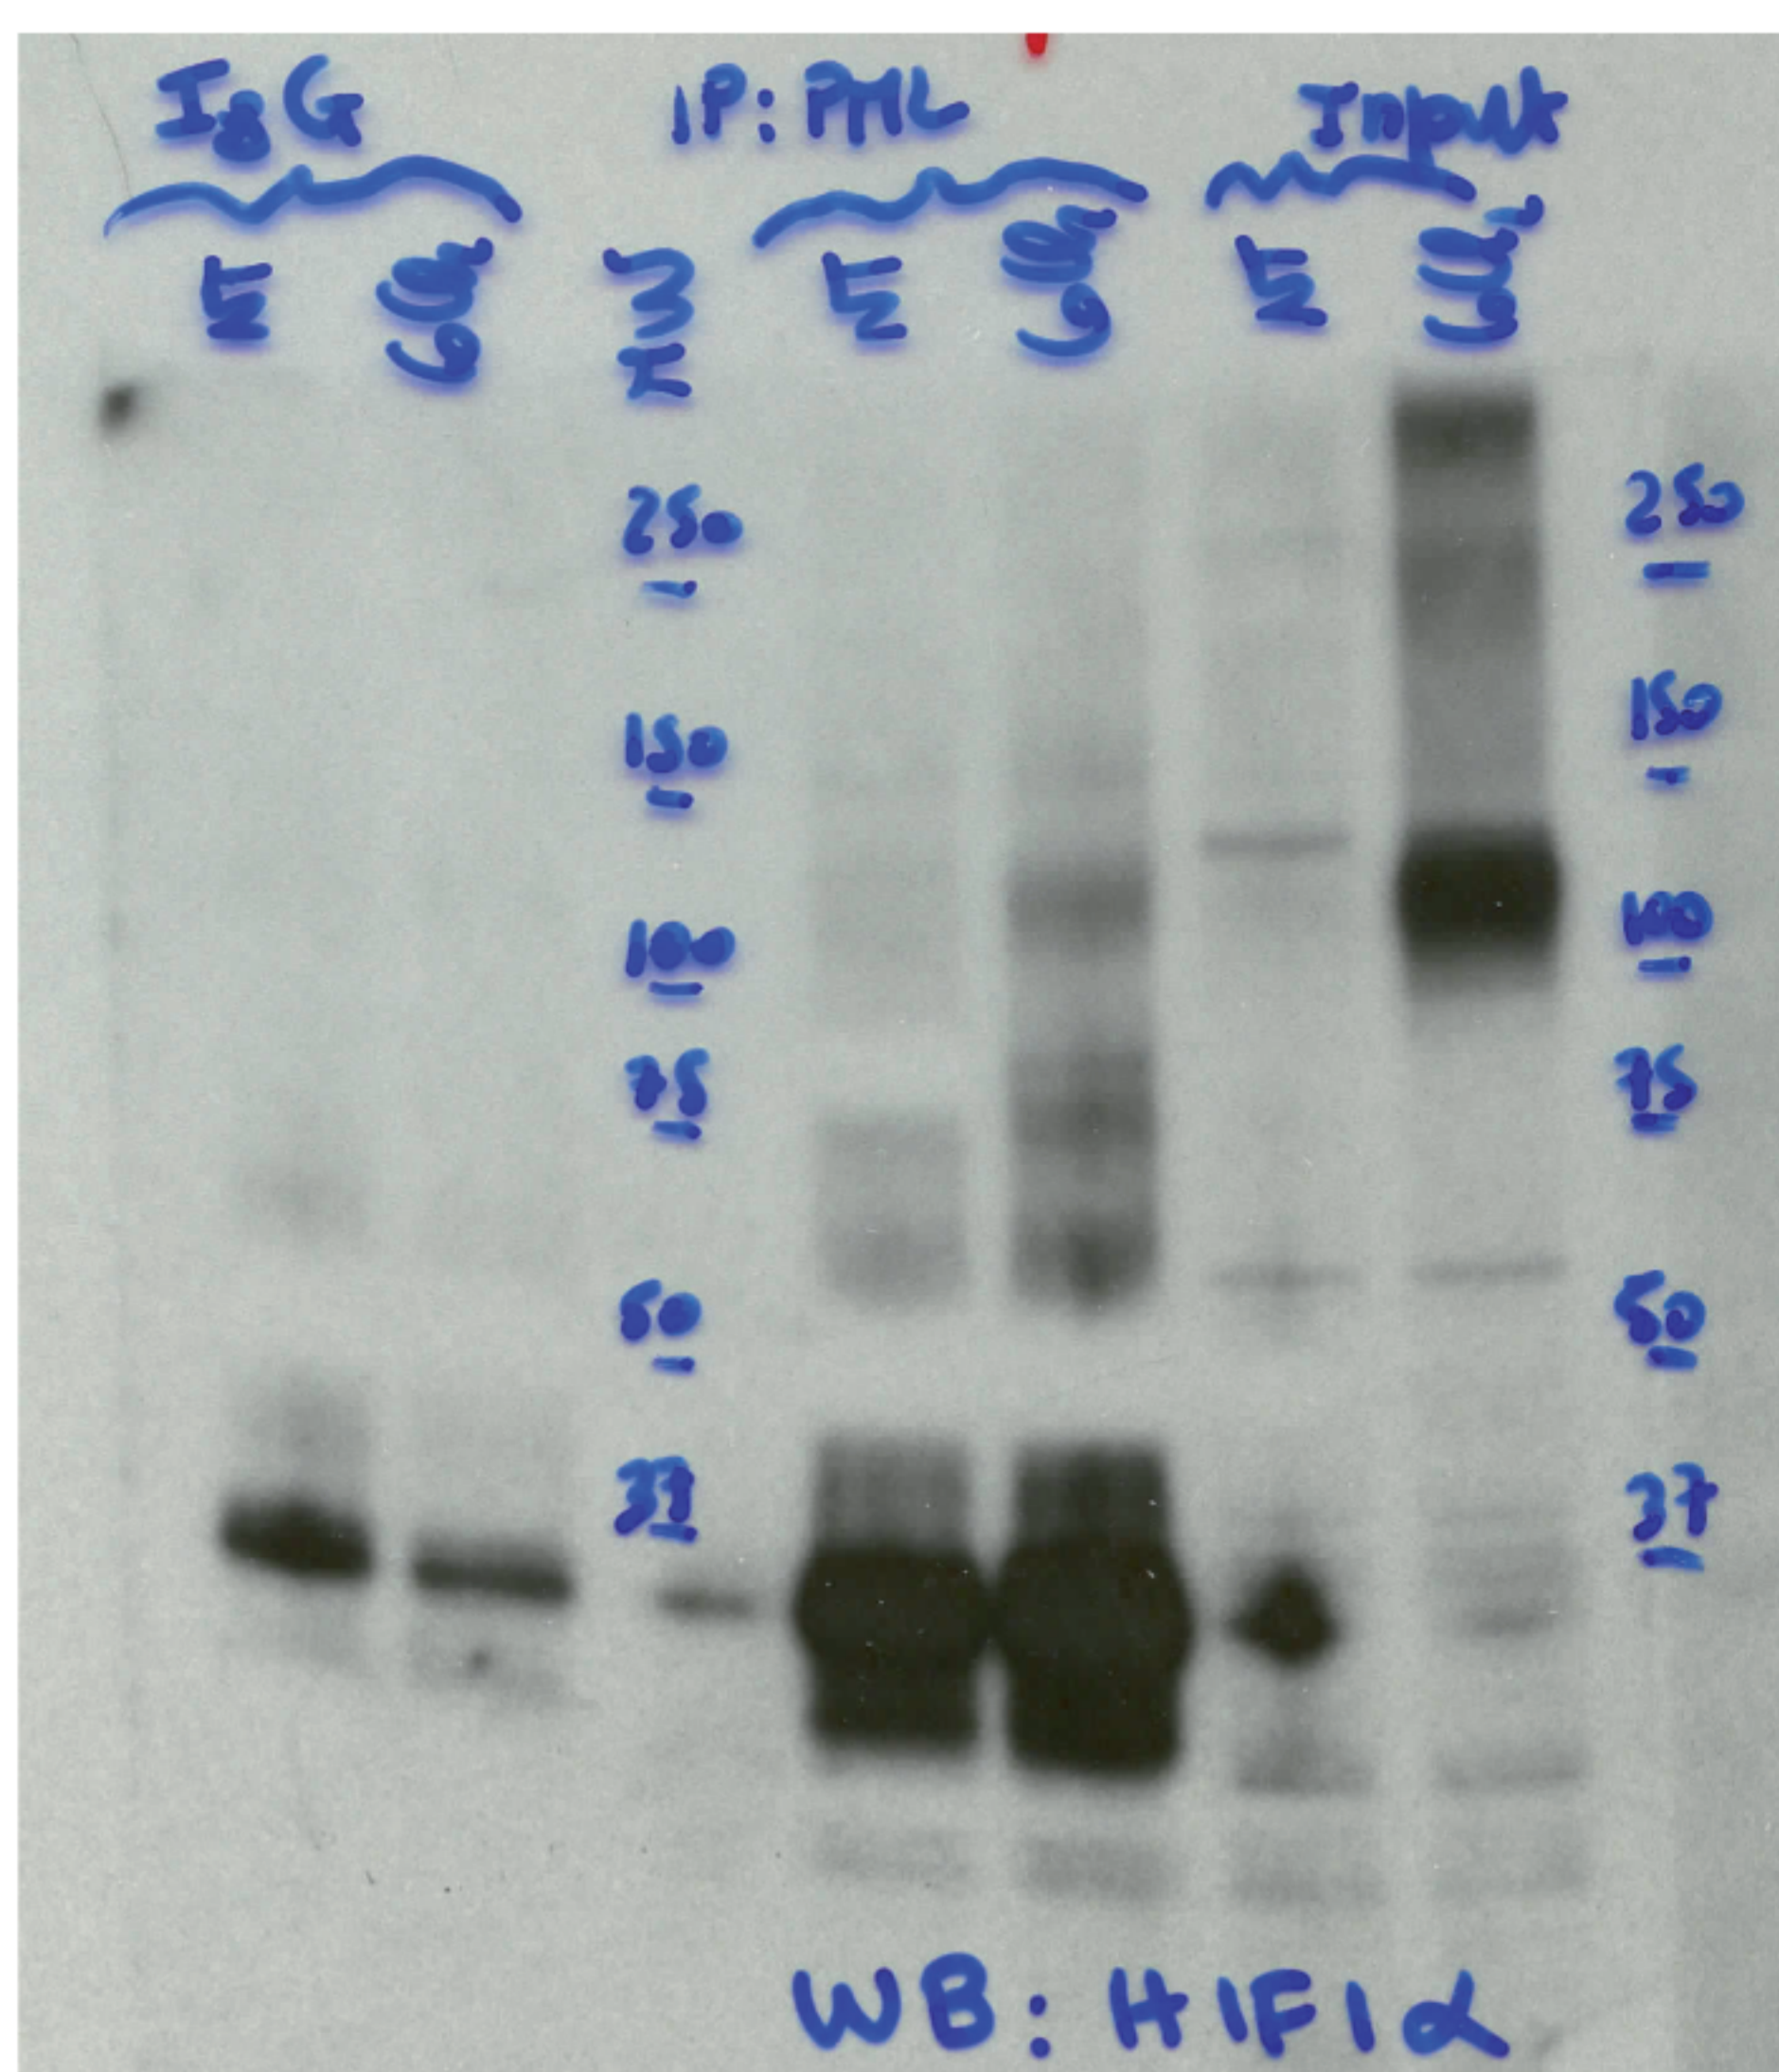

IP: PML  
WB: anti-HIF-1α

Figure 1 Panel F (Left Panel)  
higher exposure time

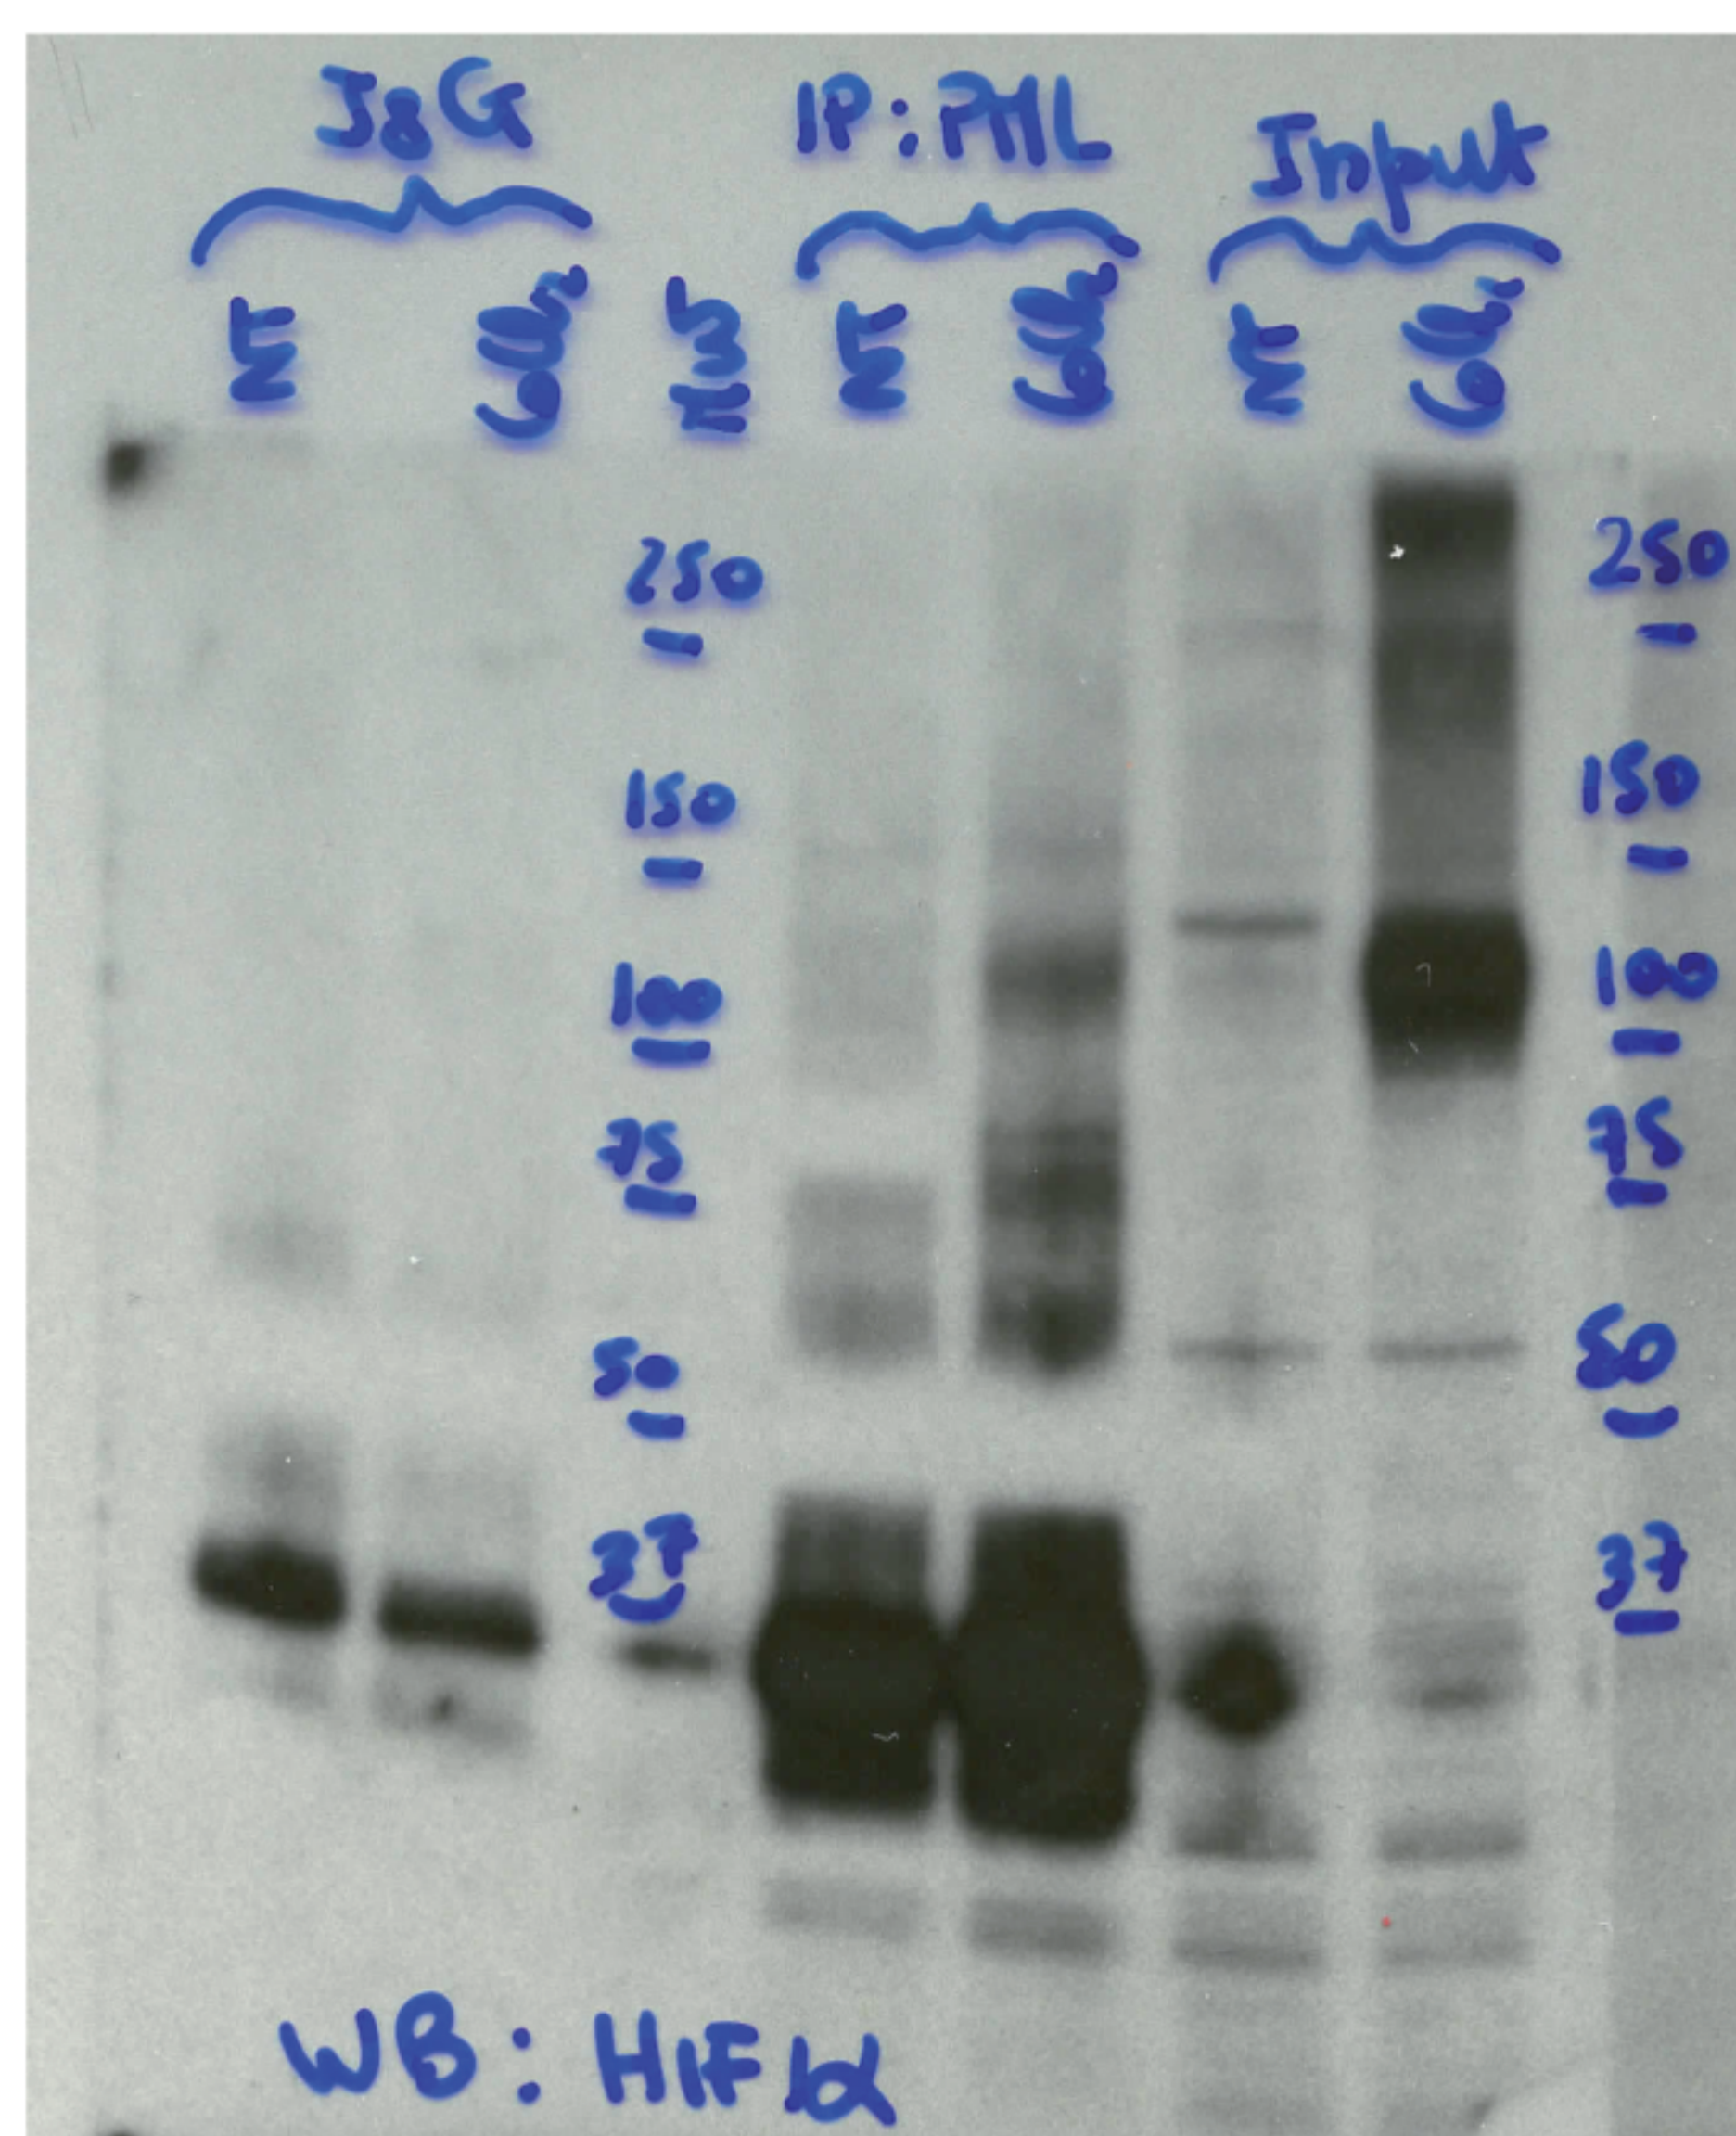

IP: PML  
WB: anti-HIF-1α

Figure 1 Panel F (Right Panel)

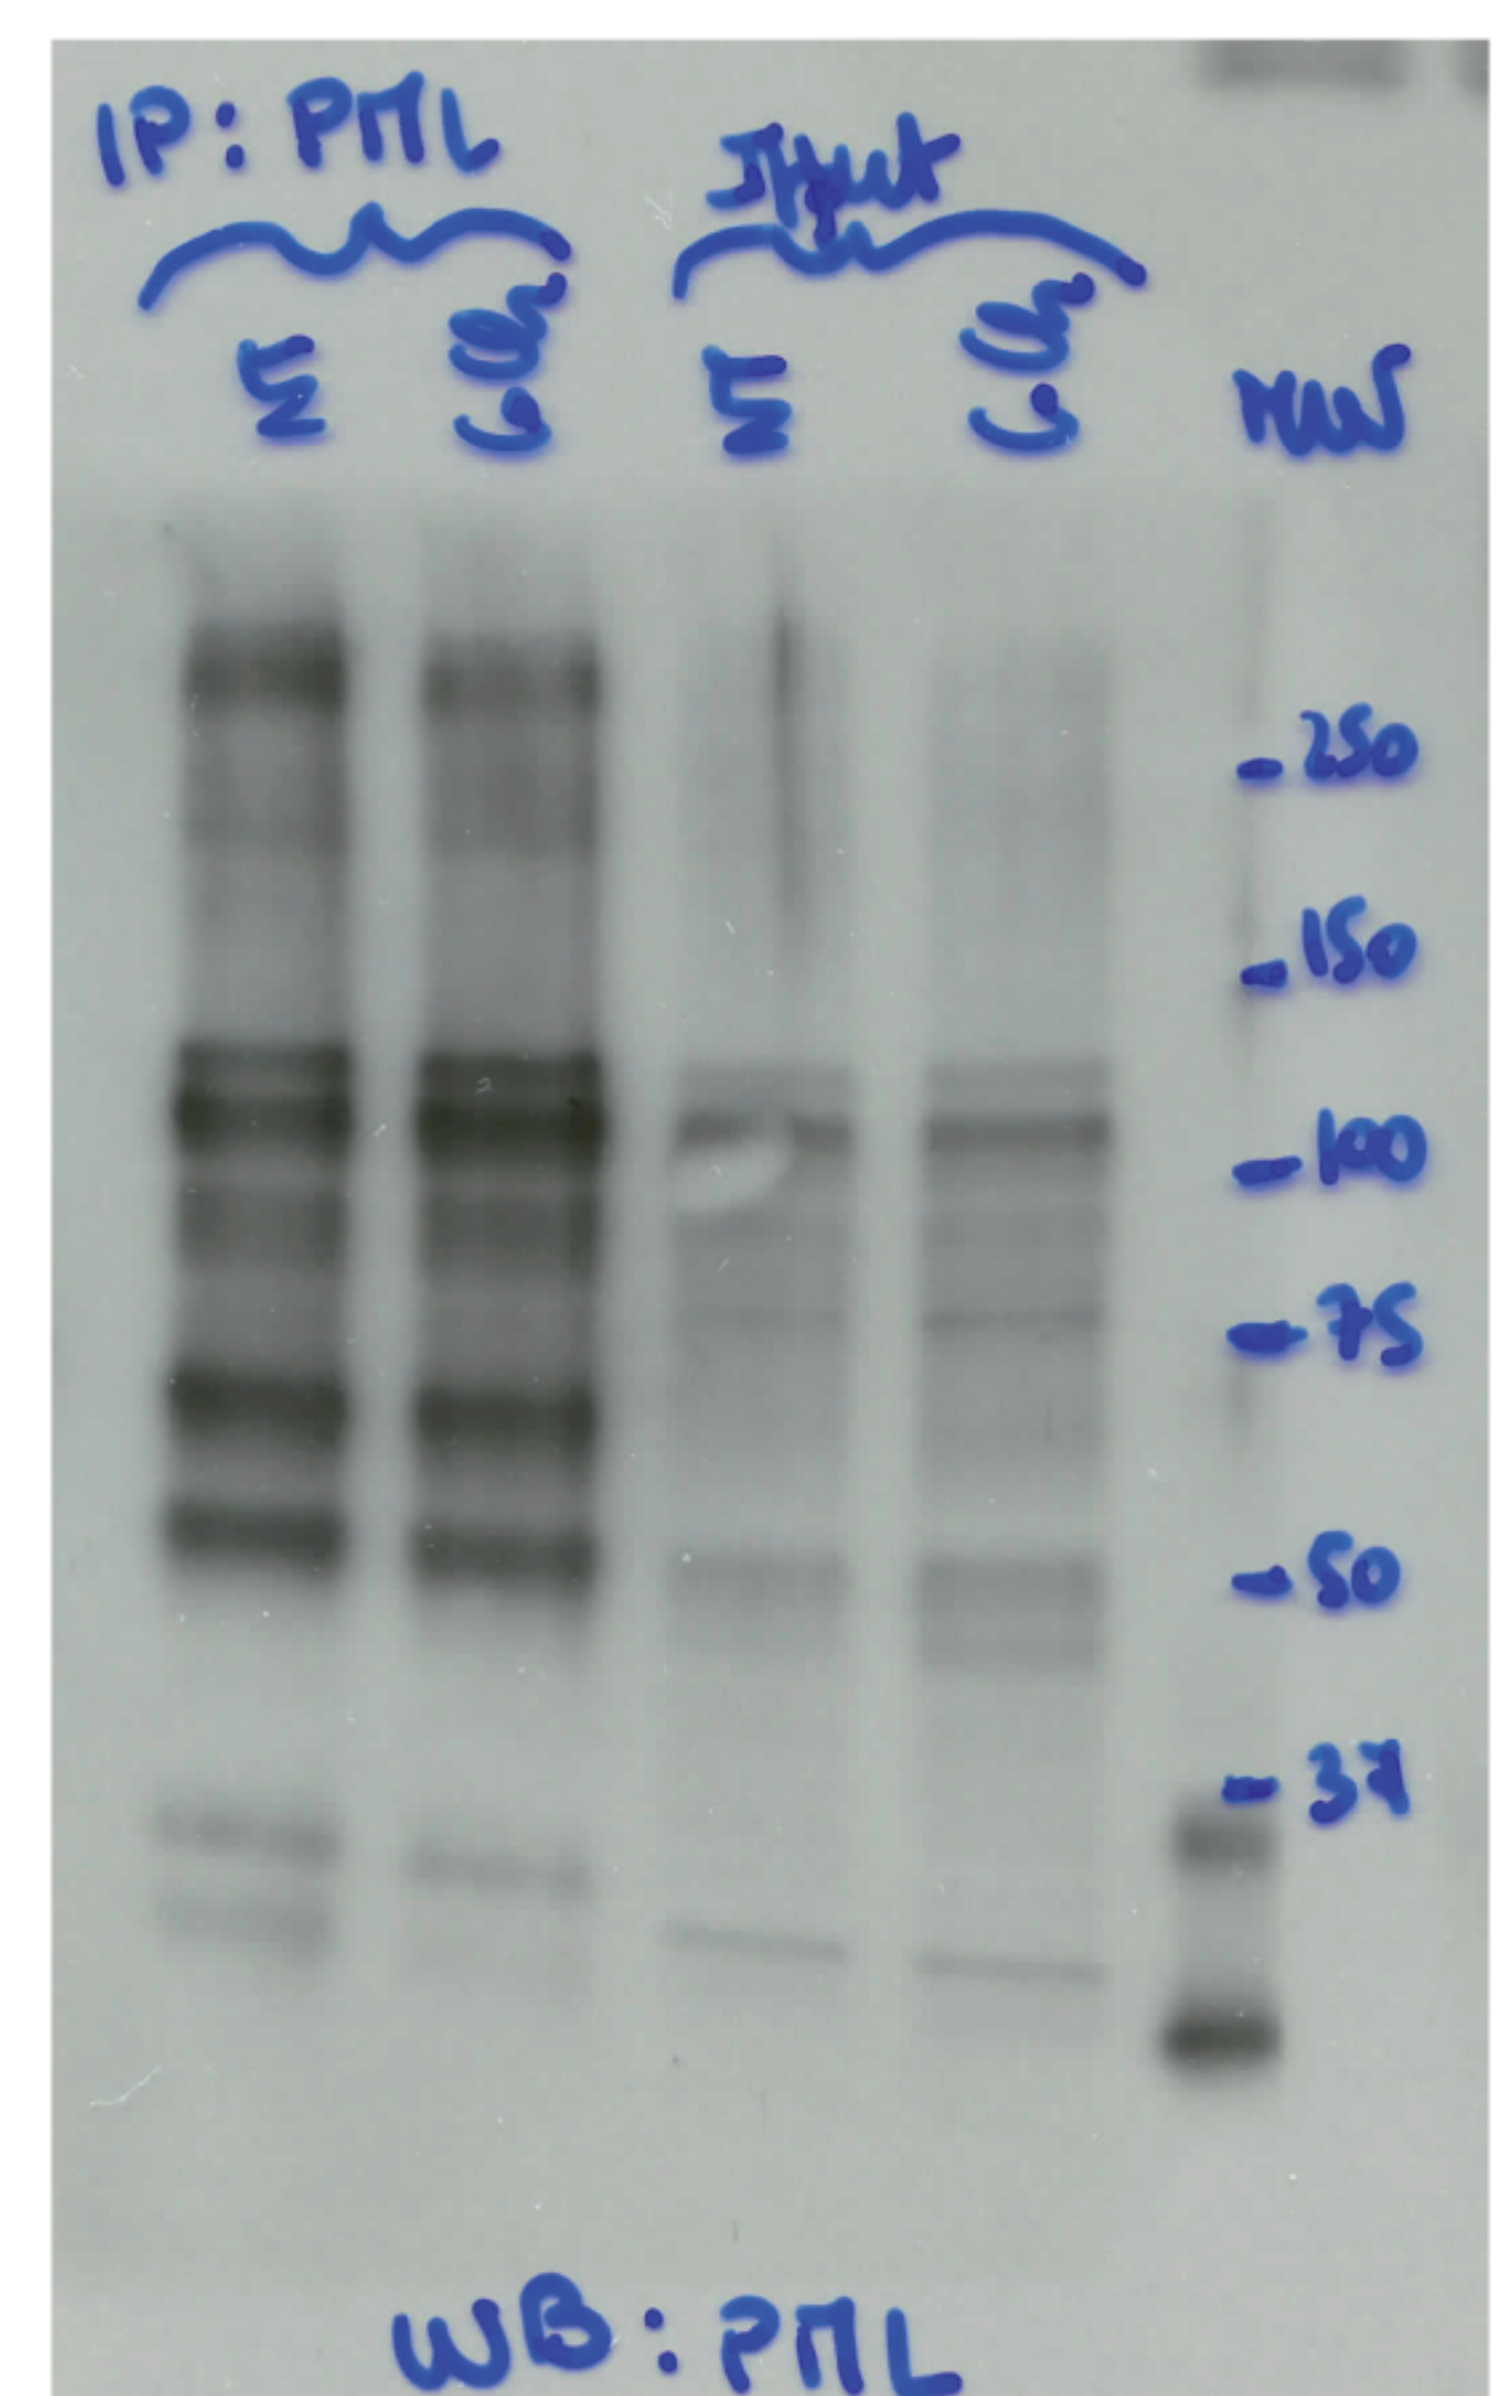

IP: PML  
WB: anti-PML
