# Supplementary material for: HIF factors cooperate with PML-RARα to promote acute promyelocytic leukemia progression and relapse
Source: PubMed Central journal article supplement (PMC4023886; doi:10.1002/emmm.201303065), 2014-04-07
Supplement: emmm0006-0640-sd9.pdf [file emmm0006-0640-sd9.pdf]

Figure 3 Panel B

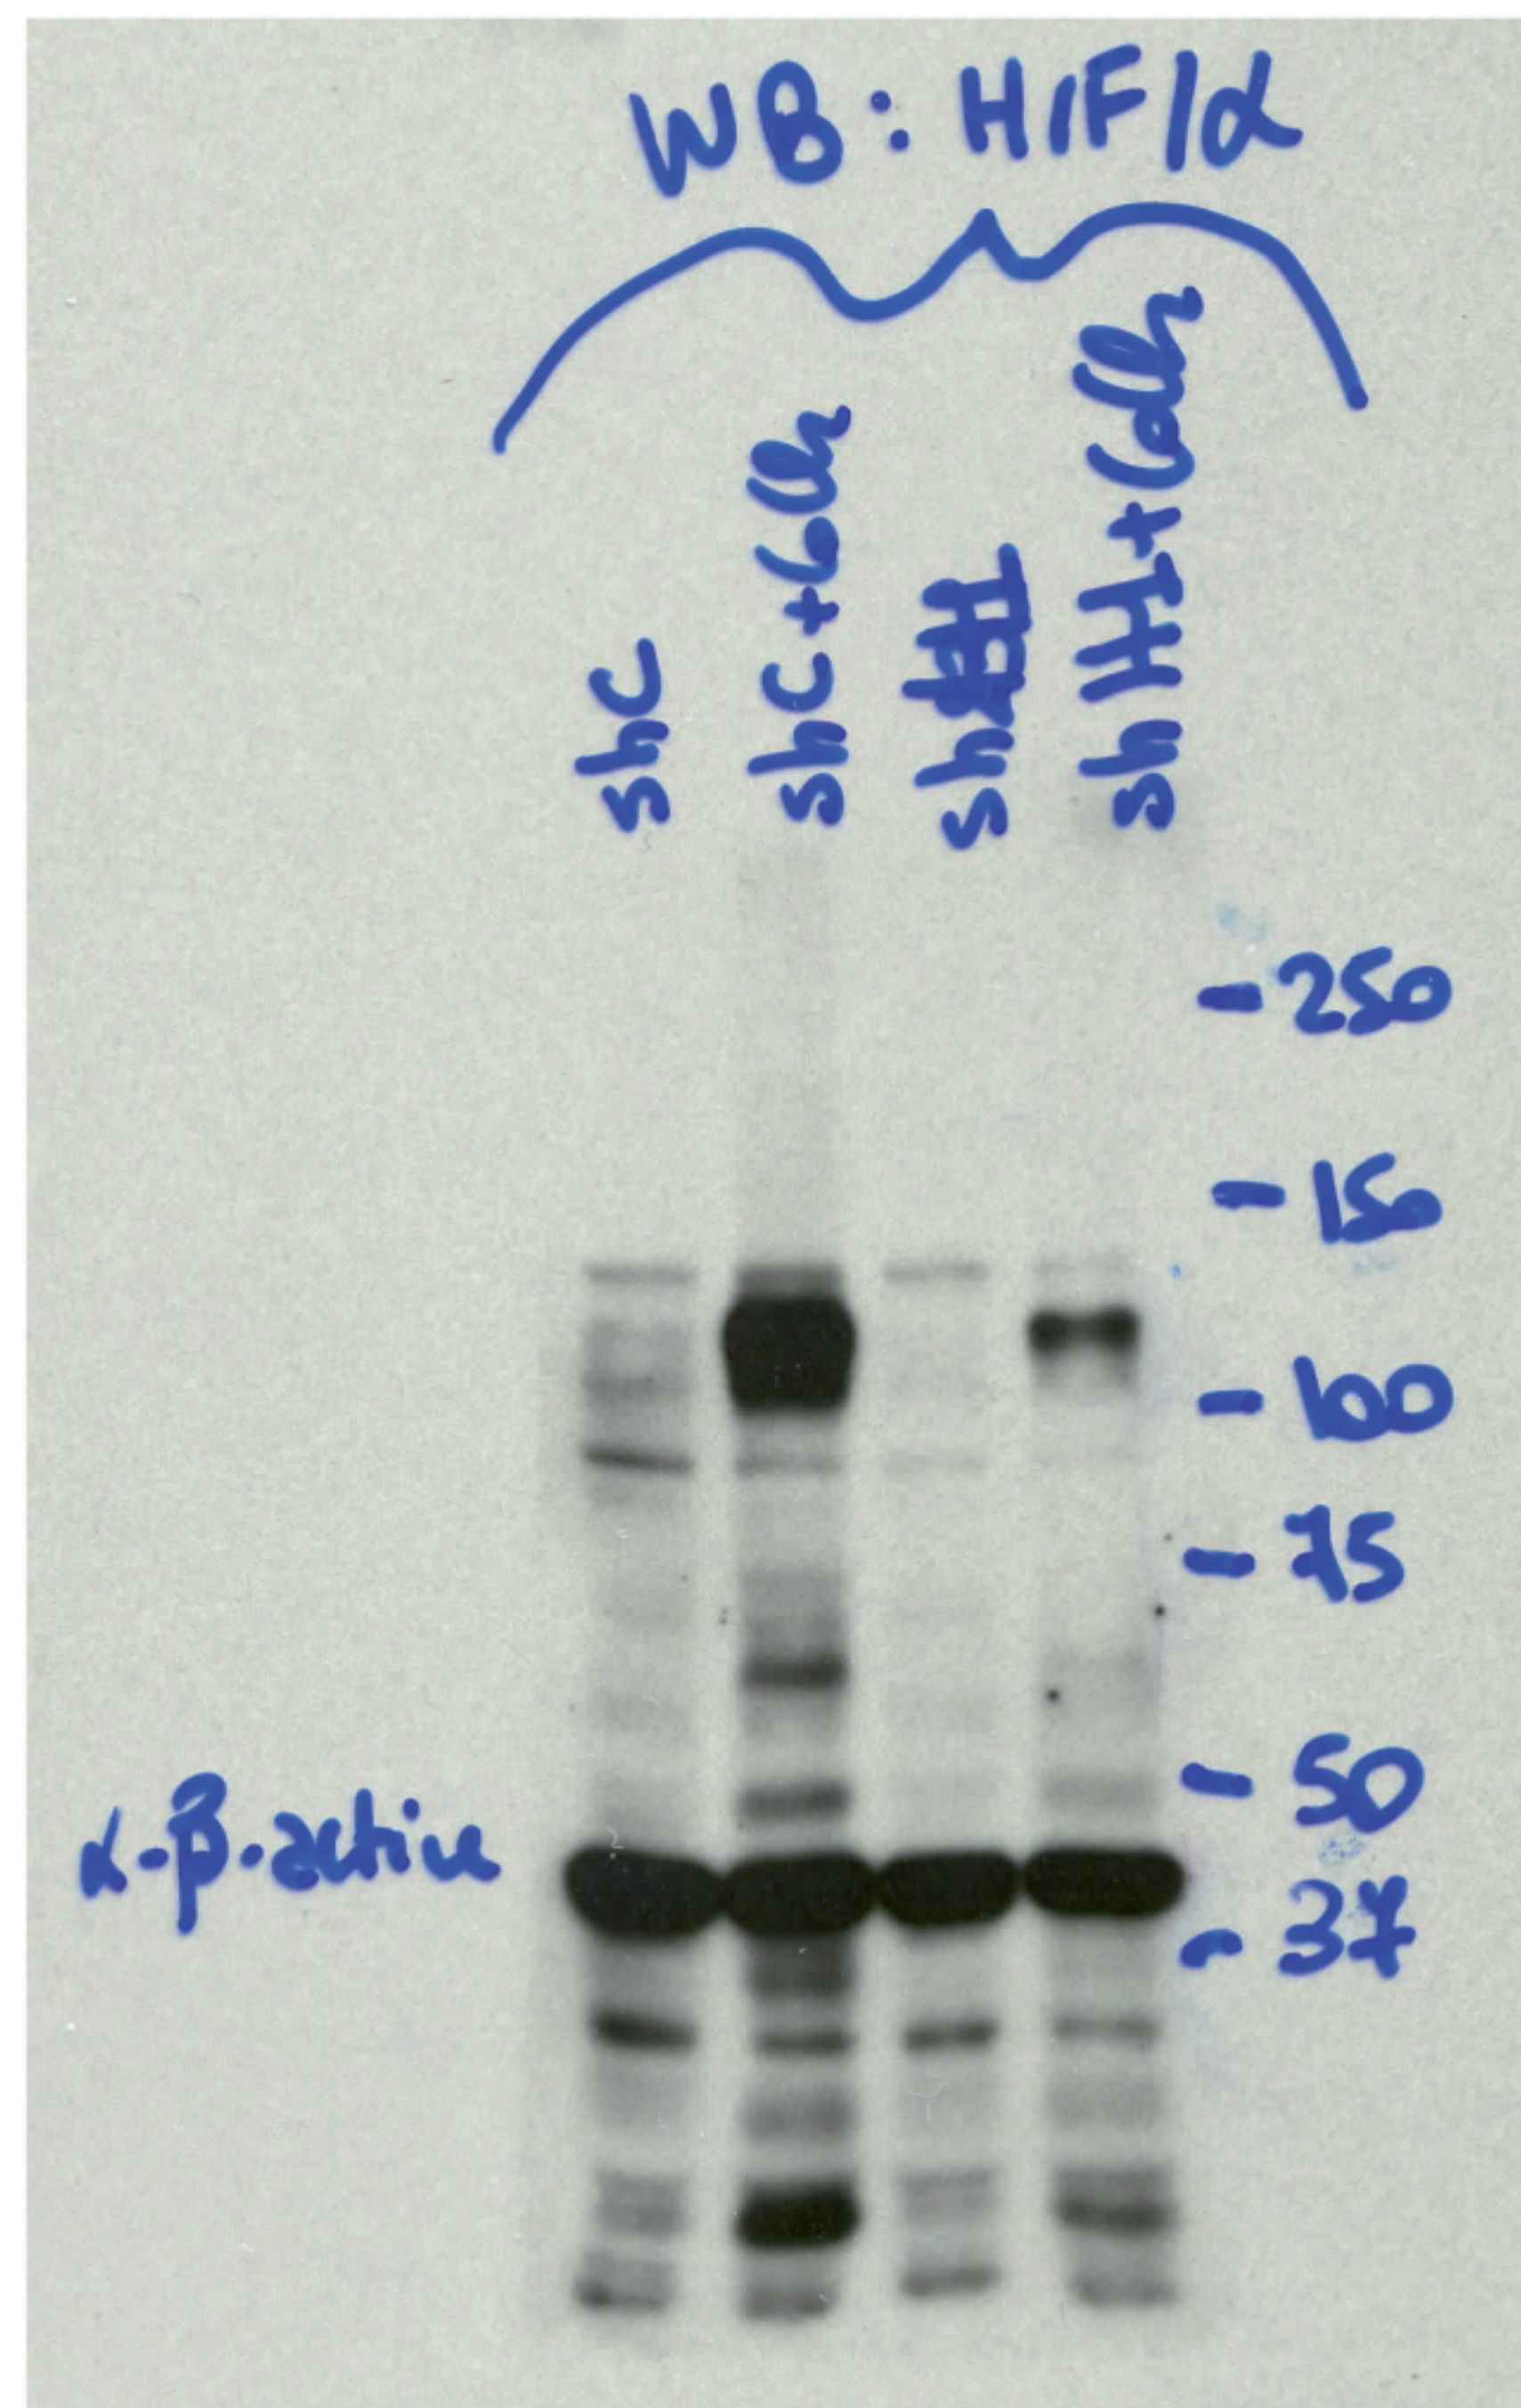

WB: anti-HIF-1 $\alpha$  + anti- $\beta$ -actin

Figure 3 Panel B  
higher exposure time

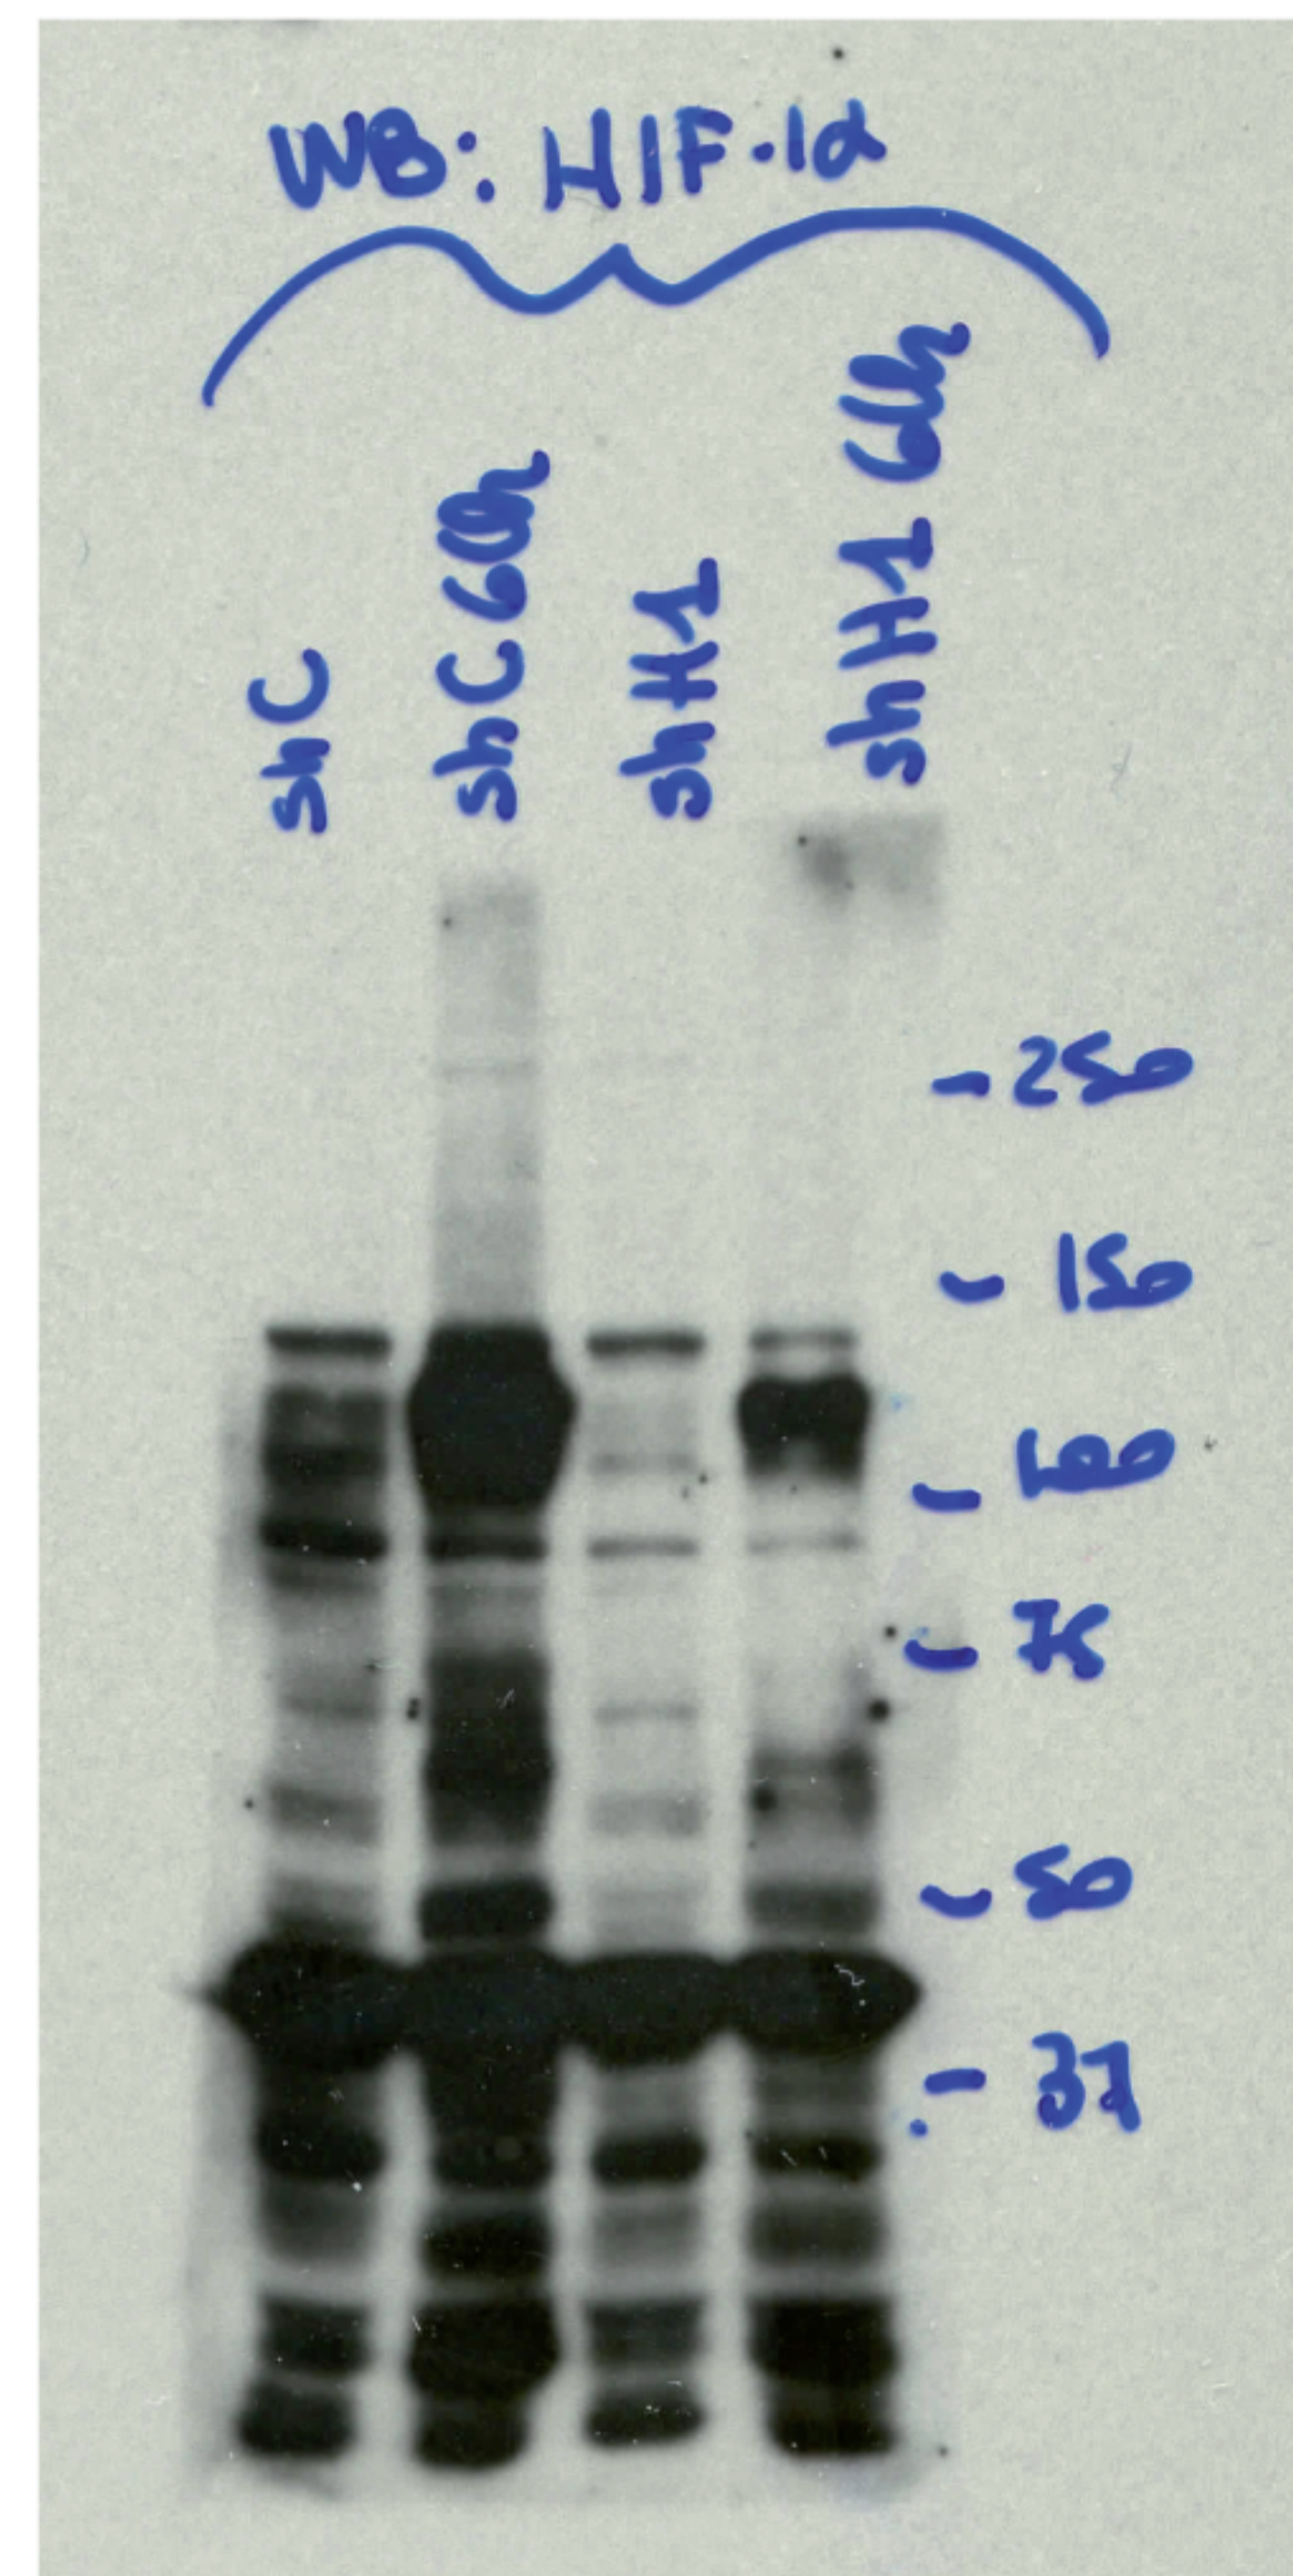

WB: anti-HIF-1 $\alpha$  + anti- $\beta$ -actin
